# Supplementary material for: Pulmonary metastasectomy for sarcoma: a systematic review of reported outcomes in the context of Thames Cancer Registry data
Source: PubMed Central journal article supplement — BMJ Open. 2012 Oct 9;2(5):e001736. doi: 10.1136/bmjopen-2012-001736 (PMC3488730; doi:10.1136/bmjopen-2012-001736), 2012-10-09
Supplement: bmjopen-2012-001736.draft_revisions.pdf [file bmjopen-2012-001736.draft_revisions.pdf]

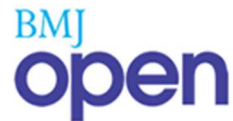

**Pulmonary metastasectomy for sarcoma: a systematic review of reported outcomes in the context of Thames Cancer Registry data**

|                                 |                                                                                                                                                                                                                                                                                                                                                          |
|---------------------------------|----------------------------------------------------------------------------------------------------------------------------------------------------------------------------------------------------------------------------------------------------------------------------------------------------------------------------------------------------------|
| Journal:                        | <i>BMJ Open</i>                                                                                                                                                                                                                                                                                                                                          |
| Manuscript ID:                  | bmjopen-2012-001736                                                                                                                                                                                                                                                                                                                                      |
| Article Type:                   | Research                                                                                                                                                                                                                                                                                                                                                 |
| Date Submitted by the Author:   | 06-Jul-2012                                                                                                                                                                                                                                                                                                                                              |
| Complete List of Authors:       | Treasure, Tom; UCL, Clinical Operational Research Unit<br>Fiorentino, Francesca; Imperial College, National Heart and Lung Institute (NHLI) Cardiothoracic Surgery<br>Scarci, Marco; Papworth Hospital, Cardiothoracic Surgery<br>Moller, Henrik; Kings College London, Thames Cancer Registry<br>Utley, Martin; UCL, Clinical Operational Research Unit |
| <b>Primary Subject Heading</b>: | Oncology                                                                                                                                                                                                                                                                                                                                                 |
| Secondary Subject Heading:      | Evidence based practice, Surgery                                                                                                                                                                                                                                                                                                                         |
| Keywords:                       | Sarcoma < ONCOLOGY, Cardiothoracic surgery < SURGERY, Adult thoracic medicine < THORACIC MEDICINE                                                                                                                                                                                                                                                        |
|                                 |                                                                                                                                                                                                                                                                                                                                                          |

SCHOLARONE™  
Manuscripts

1  
2  
3  
4  
5  
6  
7  
8 Pulmonary metastasectomy for sarcoma: a systematic review of reported outcomes in the  
9 context of Thames Cancer Registry data  
10

11 Tom Treasure<sup>1</sup>  
12 Francesca Fiorentino<sup>2</sup>  
13 Marco Scarci<sup>3</sup>  
14 Henrik Møller<sup>4</sup>  
15 Martin Utley<sup>1</sup>  
16

17 <sup>1</sup>Clinical Operational Research Unit  
18 UCL (Department of Mathematics)  
19 4 Taviton Street  
20 London WC1H 0BT  
21

22 <sup>2</sup>NHLI Cardiothoracic Surgery  
23 Imperial College London  
24 Hammersmith Hospital Campus  
25 Du Cane Road  
26 London W12 0NN  
27

28 <sup>3</sup>Department of Thoracic Surgery  
29 Papworth Hospital NHS Foundation Trust  
30 Cambridge University Health Partner  
31 Papworth Everard, Cambridge  
32 CB23 3RE  
33 UK  
34

35 <sup>4</sup>King's College London  
36 Thames Cancer Registry  
37 London UK  
38  
39  
40  
41  
42  
43  
44  
45  
46  
47  
48  
49  
50  
51  
52  
53  
54  
55  
56  
57  
58  
59  
60

1  
2  
3  
4  
5  
6  
7  
8 All authors have completed the Unified Competing Interest form at  
9 [http://www.icmje.org/coi\\_disclosure.pdf](http://www.icmje.org/coi_disclosure.pdf) (available on request from the corresponding  
10 author) and declare: no support from any organisation for the submitted work; no  
11 financial relationships with any organisations that might have an interest in the submitted  
12 work in the previous three years, no other relationships or activities that could appear to  
13 have influenced the submitted work.

14  
15 The Corresponding Author has the right to grant on behalf of all authors and does grant  
16 on behalf of all authors, an exclusive licence on a worldwide basis to the BMJ Publishing  
17 Group Ltd and its Licensees to permit this article (if accepted) to be published in BMJ  
18 editions and any other BMJPGJ products and sublicences to exploit all subsidiary rights,  
19 as set out in our licence ([http://resources.bmj.com/bmj/authors/checklists-forms/licence-  
20 for-publication](http://resources.bmj.com/bmj/authors/checklists-forms/licence-for-publication)).

21  
22 There was no funding for this study

#### 23 Contributorship statement

- 24 • Tom Treasure instigated the study, reviewed and revised data extraction, created  
25 the data tables, did a critical textual review, wrote the first draft and edited all  
26 subsequent drafts.
- 27 • Francesca Fiorentino did the initial data extraction and created the final versions  
28 of the figures.
- 29 • Marco Scarcie did the initial literature search and subsequent updated literature  
30 searches.
- 31 • Henrik Moller [was responsible for identification, extraction and analysis of ed and  
32 extracted](#) comparative data from the Thames Cancer Registry.
- 33 • Martin Utley oversaw data analysis, interpretation and presentation.
- 34 • All authors reviewed the manuscript at each stage and have approved the  
35 submitted version.

#### 36 37 38 Acknowledgments:

39 We are grateful to Fergus Macbeth, Penella Woll, Peter Goldstraw and Ian Judson for  
40 reading and commenting helpfully on earlier versions of this manuscript.

41 [At Thames Cancer Register we thank Marie Horton and Alexander Massey for data  
42 analysis.](#)

43  
44 We are willing to share data.  
45  
46  
47  
48  
49  
50  
51  
52  
53  
54

Formatted: Font: Times New Roman, 12 pt

Formatted: Font: Times New Roman, 12 pt

1  
2  
3  
4  
5  
6  
7  
8  
9  
10  
11  
12  
13  
14 Objectives: Sarcoma has a predilection to metastasis to the lungs. Surgical excision of  
15 these metastases (pulmonary metastasectomy) when possible has become standard  
16 practice. We reviewed the published selection and outcome data.

17  
18 Design: Systematic review of published reports that include survival rates or any other  
19 outcome data. Survival data were compared with those in a cancer registry.

20  
21 Setting: Specialist thoracic surgical centres reporting the selection and outcome for  
22 pulmonary metastasectomy in 18 follow up studies published 1991-2010.

23  
24 Participants: Patients having one or more of 1357 pulmonary metastasectomy operations  
25 performed between 1980 and 2006.

26  
27 Interventions: All patients had surgical pulmonary metastasectomy. A first operation was  
28 reported in 1196 patients. 43% of 1357 patients had subsequent metastasectomy, some  
29 having 10 or more thoracotomies. Three studies were confined to patients having  
30 repeated pulmonary metastasectomy.

31  
32 Primary and secondary outcome measures: Survival data to various time points usually  
33 five years and sometimes three or ten years. No symptomatic or quality of life data were  
34 reported.

35  
36 Results: 34% and 25% of patients were alive five years after a first metastasectomy  
37 operation for bone or soft tissues sarcoma. Better survival was reported with fewer  
38 metastases and longer intervals between diagnosis and the appearance of metastases. In  
39 the Thames Cancer Registry for 1985-1994 and 1995 to 2004 five year survival rates for  
40 all patients with metastatic sarcoma were 20% and 25% for bone, and for soft tissue  
41 sarcoma 13% and 15%.

42 Conclusions:

43 The 5 year survival rate amongst patients who have pulmonary metastasectomy is higher  
44 than that observed among unselected registry data for patients with any metastatic disease  
45 at diagnosis. There is no evidence that survival difference is attributable to  
46 metastasectomy. No data were found on respiratory or any other symptomatic benefit.  
47 Given the certain harm associated with thoracotomy, often repeated, better evidence is  
48 required.

## Introduction

Pulmonary metastasectomy is a well established component in the management of sarcoma. Metastases may be confined to the lung where, surrounded by air containing lung, they are readily detected on radiographs and are usually surgically accessible. The Cooperative Osteosarcoma Study Group (COSS) found that, of 202 patients who had metastases at diagnosis, 81% had lung metastases and 62% only lung metastases.[1] In an analysis of three European Osteosarcoma Intergroup (EOI) randomised controlled trials of chemotherapy, of 564 patients who had recurrence, 307 (54%) had metastases only in the lung.[2] Osteosarcoma particularly affects the young, who are better able to withstand surgery and, if they can be cured by eradicating the disease, or their survival is substantially lengthened, there are potentially many years of life expectancy to be restored.

The decision to perform pulmonary metastasectomy is usually now made by specialist sarcoma teams and is based on factors such as the interval since surgery, the number and rate of growth of metastases, and their response to chemotherapy. The surgical approach may be videothoroscopic or by thoracotomy, and surgery may be through staged lateral thoractomies or bilateral through an anterior approach. The pulmonary resections are also “individualised” depending on the location, size and number of metastases, with an implicit commitment to spare as much lung parenchyma as possible. It may be this degree of variability which makes data tabulation difficult. The authors of the 2011 EOI analysis acknowledged that “Amongst the limitations is the limited information on how the recurrences were treated. However, all patients were treated in experienced sarcoma centres and it is likely that all patients received the best available treatment for their recurrence. This includes, whenever possible, complete resection of a local recurrence and/or surgical treatment of all distant recurrences in case of resectable disease.”[2]

In 2006 the UK National Institute of Health and Clinical Excellence (NICE) which issues guidance to the National Health Service in England and Wales, published a manual for commissioners of cancer service on “Improving Outcomes for People with Sarcoma”. [3] The manual is more about organization than practice and states that “The management of chest wall, intrathoracic sarcomas and pulmonary metastases requires a combination of skills available from a sarcoma MDT and a thoracic surgeon, often combined with plastic surgical reconstructive skills”. Included in this guidance is advice on surveillance for the appearance of pulmonary metastases and states in that context “None of the 21 patients who presented between follow-up visits with symptomatic pulmonary metastases were considered candidates for potentially curative surgical resection of their metastases. Resection of pulmonary metastases was performed for 24 of the 36 patients whose asymptomatic recurrence was discovered by surveillance chest X-ray or staging CT scan”[3] based on evidence reviewed.[4,5] There is evident readiness to operate on asymptomatic pulmonary metastases in sarcoma patients but evidence for the practice, or guidance which patients are believed to benefit, cannot be inferred from this practice manual.

Thoracic surgeons are increasingly being asked to remove lung metastases as part of the overall management for a wide range of cancers. In a survey conducted by the European

1  
2  
3  
4  
5  
6  
7  
8 Society of Thoracic Surgeons (ESTS)[6] practice varied considerably. In particular there  
9 was a wide range of opinions on the weight to be placed on factors known to be  
10 associated with survival such as the time elapsed since diagnosis of the primary tumour  
11 and the number of metastases seen on imaging. This survey was part of a wider  
12 programme of work called The European Society of Thoracic Surgeons Lung  
13 Metastasectomy Project.[7] In the introduction to the published report the leaders of the  
14 project concluded “the level of evidence to support current practice is too low to set firm  
15 recommendations to the members of ESTS.” At the time of writing up The European  
16 Society of Thoracic Surgeons Lung Metastasectomy Project an up to date review of  
17 metastasectomy for sarcoma was not available and the report went to press without it.  
18 We have therefore undertaken a literature search and a systematic review of pulmonary  
19 metastasectomy for sarcoma.

## 20 21 **Material and methods**

### 22 Eligibility criteria.

23 A literature search was conducted according to PRISMA 2009 recommendations. [8,9]  
24 We considered eligible all the articles in the English [language literature](#), from 1950 to the  
25 first week of June 2011, which contained at least 20 patients and any data on surgical  
26 outcome(s). Reviews and teaching articles which contributed no data for analysis were  
27 excluded. Thames Cancer Registry data were extracted for all cases of bone and soft  
28 tissue sarcoma registered from 1985 to 2008.

### 29 Types of participant

30 All patients of any age undergoing pulmonary metastasectomy from any type of sarcoma  
31 (bone, soft and mixed series) regardless of first time or repeated.

### 32 Type of intervention

33 First time or repeated metastasectomy from sarcoma.

### 34 Information sources.

35 A Medline search was conducted using OVIDSP interface. Medline web interface at  
36 www.pubmed.gov was also searched. The Thames Cancer Registry data was used as  
37 comparator.

### 38 Electronic Search.

39 The search expression used was: [lung.mp] AND [metastasectomy.mp] and  
40 [sarcoma.mp].

### 41 Study selection.

42 One author (MS) evaluated the reports quality from titles and abstracts identified from  
43 the electronic database searches according to the pre-defined eligibility criteria. Full text  
44 articles of studies of potentially relevant studies that met the inclusion criteria were  
45 retrieved to assess definite eligibility for inclusion.

### 46 Data collection process.

1  
2  
3  
4  
5  
6  
7  
8 The data was extracted by 2 of the authors (MS, FF) independently and then checked by  
9 another author (TT).

10  
11 Data items.

12 The selected papers were searched and, where available, data were extracted with respect  
13 to:

- 14 • Research methodology employed
- 15 • The purpose of the study
- 16 • The patient population from which pulmonary metastasectomy patients were  
17 drawn
- 18 • Inclusion and exclusion criteria
- 19 • Demographic data on patients selected and reported
- 20 • The interval between primary surgery and diagnosis and pulmonary  
21 metastasectomy
- 22 • Chemotherapy use
- 23 • Surgical approach, whether open or videothoracoscopic
- 24 • Surgical techniques employed
- 25 • Survival data
- 26 • Statistical analyses of factors related to outcome
- 27 • Consideration of second and subsequent metastasectomy operations
- 28 • Symptoms and respiratory performance

29  
30 Thames Cancer Registry data were extracted for stage, data on interventions, [sex ratio](#),  
31 [median age](#) and survival.

### 32 33 34 **Results**

35 The search returned 98 articles. In addition the reference lists of all papers were searched.  
36 We retrieved a further 17 articles, to make the total up to 115 having excluded duplicate  
37 records by title, authors or DOIs. Sixty five articles were excluded by title and/or  
38 abstract according to the specified criteria. The full text of the remaining 50 articles was  
39 retrieved. A further 32 were further excluded because they did not meet the initial criteria  
40 after full text review or duplicated data.

41  
42 We retained 18 articles published since 1990 for inclusion in the systematic review: five  
43 report on first and subsequent pulmonary metastasectomy for bone sarcoma, [10-14] six  
44 on soft tissue sarcoma, [15-20] and four on mixed sarcoma series.[21-24] The  
45 information in Tables 1, 2, 4, and 6 are extracted from these 15 studies which include  
46 data on the patients' first pulmonary metastasectomy. Three of the 18 are confined to  
47 repeat pulmonary metastasectomy.[25-27] One of these[27] contained 14 patients rather  
48 than the specified minimum of 20 patients but is a further report providing outcomes for  
49 repeat metastasectomy of some of the patients reported from the same institution and was  
50 therefore included.[13]

51  
52 With respect to research methodology, there were no randomised controlled trials. There  
53 was one comparison study in which patients who had undergone videothoracoscopic

1  
2  
3  
4  
5  
6  
7  
8  
9 resection were matched with patients who had undergone a thoracotomy approach.-[24]  
10 There were no protocol based prospective studies. There was one retrospective cohort  
11 study of data obtained from a Cancer Centre's institutional Tumor Registry.[11] In other  
12 reports, cases were identified from databases which were held, as far as we could  
13 determine, at an institutional level-[10,12-17,20,23,26,27] or departmental level.  
14 [18,19,21,24,25] It appears that many of the clinical data were retrieved by retrospective  
15 case note review. A statement in a report from the M D Anderson Cancer Centre  
16 (MDACC) is probably representative of the approach to data collection: "A prospective  
17 surgical database was used to identify metastasectomy patients and missing clinical data  
18 were supplemented in a retrospective manner." [23]

19 In most studies the stated purpose of analysis was to report survival following first [10-  
20 21,23,24] or repeated pulmonary metastasectomy.[22,25-27] In ten of the 18 reports,  
21 statistical analyses were performed to identify patient and tumour characteristics  
22 associated with improved survival following first pulmonary metastasectomy.  
23 [11,13,14,16,18,19,21,23,25,26]

24 The population from which the patients having pulmonary metastases were drawn, is  
25 given in seven publications.[10-12,14,15,17,23] (Table 1) As can be seen from the  
26 footnotes to the table, no two denominators are defined in the same way and none are  
27 comprehensive at a community level. Some authors give an upper age limit (not more  
28 than 55 years,[12] 40 years,[14] or 20 years[11]) but read in context this appears to be to  
29 match the data set of operated patients rather than a prior policy. Some series include all  
30 sites while others are limited to limbs[10,12] or trunk and limbs.[11] They variously  
31 include all sarcoma patients,[23] or only those with soft tissue sarcoma.[17] The  
32 proportion of the denominator population recorded as developing pulmonary metastases  
33 ranges between 18% to 50% while the proportion of those with pulmonary metastases  
34 who have an operation to remove them varied from 5% to 88%. The report with the  
35 largest data set (MDACC) [23] reported that only 1% of sarcoma patients have a  
36 pulmonary metastasectomy. We have not found it possible to determine how much of the  
37 variation in the recorded data is attributable to varying selection in clinical practice, the  
38 different biology of tumours according to histology, tumour site, or variation amongst  
39 patients. A large amount of the variation appears to depend on how wide the net is cast  
40 in capturing the denominator.  
41

42 Amongst these 18 studies of pulmonary metastasectomy for sarcoma the inclusion  
43 criteria are much as those proposed by Thomford [28] that the cancer at the primary site  
44 was eradicated, controlled, or amenable to control;[10,12,13,15,17-22,24,26,27] that the  
45 metastatic lung disease was amenable to complete resection;[10,11,13,15,18-21,24,26,27]  
46 that there was no metastatic disease elsewhere;[10,12,13,15,17-22,24,26,27] and that the  
47 patient was expected to withstand the loss of lung tissue necessary to give clearance.[10-  
48 12,15,17-22,24,26,27] In individual instances authors specified that there should be no  
49 mediastinal or chest wall involvement;[17] absence of pericardial or pleural  
50 effusions;[12] that the overall operative risk was acceptable;[26] or that there was no  
51 other available more effective treatment.[19] In one report, increased size on  
52 chemotherapy was allowable, but not an increase in the number of metastases.[24] One  
53  
54  
55  
56  
57  
58  
59  
60



1  
2  
3  
4  
5  
6  
7  
8 study with five subgroups gave group by group criteria which, read in context, appeared  
9 to defined after exploration of the available data to facilitate analysis and reporting.[23]  
10 Criteria for inclusion or exclusion in the metastasectomy cohort were not found in three  
11 studies.[14,16,25]  
12

13 Data are given in Table 2 for the 15 studies which include data on the first pulmonary  
14 metastasectomy, for a total of 1168 patients. The average age of bone sarcoma patients  
15 was 17 years based on 377 patients in four studies with calculable data [10,12,13],  
16 excluding the reports limited to patients aged <21 years[11] or <40 years.[14] For soft  
17 tissue sarcoma the average age was 46 based on five studies including 277 patients[16-  
18 20] excluding a study where median and range were given.[15]  
19

20 Male sex was predominant in bone sarcoma (65% of 532 patients) but not in soft tissue  
21 sarcoma reports (50% of 277 patients). These differences in age and sex preclude  
22 meaningful amalgamation of outcome data following pulmonary metastasectomy for  
23 bone and soft tissue sarcoma.  
24

25 The interval between resection of the primary and first pulmonary metastasectomy was  
26 provided in 9/15 reports and was highly variable as can be seen from Table 2. There is a  
27 degree of consistency in the median interval of 1-2 years but half of the authors providing  
28 data, operated on synchronous metastases (5 of 10). Repeat metastasectomy was  
29 performed in 43% of patients based on 14/18 reports in which the data could be extracted.  
30 (Table 3)  
31

32 Chemotherapy was frequently used but schedules were variable both within and between  
33 publications. Some authors stated that preoperative and/or post operative chemotherapy  
34 was given routinely in all cases[10,21,26,27] but more often the practice varied. [11-  
35 14,16,18,21] One paper states "The only constant was that when the disease-free interval  
36 was <2 years with a single lung metastasis, no chemotherapy was added to surgery" and  
37 another that it was at the discretion of the oncologist.[19] One group used chemotherapy  
38 preoperatively only when there were six or more metastases.[17] It was also implicit in  
39 the text of several papers that response to chemotherapy was part of the clinical evidence  
40 used to help select patients for surgery; non responding and progressing patients were  
41 less likely to be selected for pulmonary metastasectomy and this information is not  
42 necessarily explicit in the report. This statement in the report from the MDACC is  
43 representative of this approach: "Those who developed metastatic disease early with  
44 multiple pulmonary nodules were treated initially with chemotherapy to determine the  
45 pace of disease progression, if any, on treatment. Patients responding to chemotherapy,  
46 those with stable disease, and those with slow progression were referred for resection  
47 while those with rapidly progressive metastatic disease received alternative  
48 chemotherapy treatment." [23]  
49

50 Whether videoscopic or open surgery was used, and if open through what incision, and  
51 the surgical technique used to resect the metastases, are summarised in Table 4 for 12/15  
52 papers including data on first metastasectomy operations.[10-13,16-21,24] The  
53 remaining three of the 15 studies were not explicit with respect to the surgical approach.  
54  
55  
56  
57  
58  
59  
60

1  
2  
3  
4  
5  
6  
7  
8  
9  
10  
11  
12  
13  
14  
15  
16  
17  
18  
19  
20  
21  
22  
23  
24  
25  
26  
27  
28  
29  
30  
31  
32  
33  
34  
35  
36  
37  
38  
39  
40  
41  
42  
43  
44  
45  
46  
47  
48  
49  
50  
51  
52  
53  
54  
55  
56  
57  
58  
59  
60

In the more common surgery for carcinoma metastasised to the lung, lymphadenectomy has become an important consideration.[29] In these reports concerning sarcoma patients, hilar nodes were not routinely dissected[19] or maybe dissected “when necessary”.[12] This avoidance of lymphatic resection appears to be linked to the lower rate of lymphatic spread in sarcoma compared with other thoracic malignancy in which further spread from the metastases to mediastinal lymph nodes is frequent.[29]

There is a strong evident preference for open surgery (96% of patients had a thoracotomy of some form) with considerable emphasis placed by several authors on the importance of manual palpation of the lung[10-12,16,17,20,22] which cannot be achieved through a purely videoscopic approach. One study specifically addressed the question for whether the less invasive thoracoscopic approach might be as effective[24] and it was concluded that it might be an option if there are no more than two metastases but this was not derived from data analysis presented in the publication. The general use of thoracotomy, often bilateral, and repeated metastasectomy in 43% of patients overall represents a high treatment burden for patients. (Table 3)

Thames Cancer Registry data for sarcoma were studied to provide some context to the overall survival rates of patients with sarcoma. (Fig.1) The Registry has employed its own 4-level staging system since 1960 and stages around 60% of all solid tumours. The classification system uses information in the patients' notes to determine if the disease is local (stage 1), has extension beyond the organ of origin (stage 2), has regional lymph node involvement (stage 3) or has metastasised (stage 4). Survival data by stage for two complete decades 1985-1994 and 1995-2004 for both bone and soft tissue sarcoma are provided in Fig.1. For patients entered as Stage 4 bone sarcoma (metastatic disease at the time of registration) in those two decades five year survival of 20% and 25% are recorded for bone sarcoma and 13% and 15% for soft tissue sarcoma.

The Registry does not include full data on treatment but does provide data on the highest surgery code. These are presented in an abbreviated form in Table 5. According to the selection criteria set out above, since the stated first criterion for pulmonary metastasectomy was that a radical operation had been successful at the primary cancer site, it is amongst the 8% of bone sarcoma patients and 21% of soft tissue sarcoma patients that pulmonary metastasectomy patients would be found.

Five year survival data are plotted against publication date (Fig.2) and the size of the series (Fig.3) for 14 of these 15 studies where the data are given, to allow for this visual inspection of time or case volume. Three and/or five years survival for the 15 studies including first (and subsequent) metastasectomy data are plotted in Fig.4

Five year survival data are set out in Table 6 sorted by tumour type from 14 of the 15 studies including first (and subsequent) metastasectomy data. Together these provide data on 1196 patients having metastasectomy from as early as 1976 [16] to as recently as 2008.[14] Overall about a third of patients who have had pulmonary metastasectomy for

1  
2  
3  
4  
5  
6  
7  
8 bone sarcoma and about a quarter who have had pulmonary metastasectomy for STS  
9 survive beyond five years. Survival data for two complete decades 1985-1994 and 1995-  
10 2004 are included in the table to provide a reference measure of survival in all sarcoma  
11 patients in the registry who were classified as Stage 4, that is sarcoma metastasized at  
12 presentation/registration. Direct comparison cannot be made but it is a reminder that an  
13 implicit assumption that the five year survivals of the patients in the pulmonary  
14 metastasectomy series would have approached zero would be incorrect. [Summary data of  
15 sex distribution and the median age for patients in two completed decades \(1985-94 and  
16 1995-2004\) with bone and soft tissue sarcoma in Table 7.](#)

17  
18 We can reasonably deduce

- 19 1. that five year survival after pulmonary metastasectomy is not necessarily
- 20 attributable to the metastasectomy
- 21 2. that five year survival does not equate to cure since there are five year survivors
- 22 with metastatic disease.

23  
24 Data are not available in the publications concerning the fate of patients beyond five  
25 years and there are no narrative accounts of the clinical course of these patients. However  
26 a number of the authors include, in their narrative, a statement of belief in cure for  
27 patients who have recurred in the lung or that their surgery has curative  
28 intent[12,14,16,17,19,24,25] and the phrase “potentially curative resection” is included in  
29 NICE guidance.[3] Illustrative statements from recent publications are these from 2009  
30 and 2010:

31 “Given the lack of effective systemic therapies, PM remains the only potentially curative  
32 treatment for STS lung metastases as long as all known disease can be completely  
33 resected with negative margins.”[16]

34 “We demonstrate that after repeated metastasectomies, a subset of patients can be  
35 cured.”[14]

36  
37 Other author explicitly exclude likelihood of cure attributable to pulmonary  
38 metastasectomy. Antunes writes “The 5-year survival may reach 50%, although true cure  
39 is extremely rare, the majority of patients eventually dying of the disease.”[10] And  
40 Sardenberg and colleagues state “It should be emphasized that surgery does not change  
41 the biology of the tumor or the metastatic process, and a definitive cure  
42 for most patients represents the combination of host histology, tumor spread, response to  
43 systemic therapy, and surgical resection, which together render the patient free of  
44 disease.”[19]

45  
46 Several reports include multivariate analysis to seek factors that might determine a  
47 greater or lesser survival rate. The interval between diagnosis or resection of the primary  
48 cancer and the metastasectomy surgery is the commonest factor reported as being  
49 significant [11,18,19,21,23,25,26] survival usually being better if the interval was 12  
50 months or longer. Fewer metastases was also associated with better survival  
51 [13,14,18,19,23,25,26,30] most commonly at a number of about three or fewer. Female

1  
2  
3  
4  
5  
6  
7  
8 sex [14,16] was also favourable. Patients in whom there was substantial necrosis  
9 following chemotherapy survived longer.[10,11,14,22]  
10

11 No data were found regarding respiratory function or symptoms in any of the 18 reports.  
12 Where mention was made of respiratory function in the text it was related the decision to  
13 operate. Several authors explained that a point had been, or might be reached, where  
14 respiratory function or respiratory reserve precluded further metastasectomy. No  
15 measurement of this or its consequences for the patients was provided in any report.  
16

### 17 18 **Discussion**

19 A major limitation, when interpreting reports of pulmonary metastasectomy for sarcoma,  
20 is the absence of control data. It is usual in surgery to rely heavily on evidence from case  
21 series, either in the form of retrospective case note reviews or less commonly prospective  
22 cohort studies. When there is a clear temporal and mechanistic relationship between  
23 cause and effect, and the signal is evident from the noise, observational studies often  
24 provide sufficient evidence.[31] The simple evidence of cause and affect cannot be  
25 invoked where there is a widely variable time course and multimodal treatments as is the  
26 case in protracted, repeated and multimodal treatment of sarcoma.  
27

28 Efficacy, effectiveness, and cost effectiveness are different measures of the benefits of a  
29 treatment. Pulmonary metastasectomy has been shown to be efficacious in that complete  
30 macroscopic clearance has been achieved; in appropriately selected cases, R0 resection of  
31 all known pulmonary metastases can be consistently accomplished. Whether pulmonary  
32 metastasectomy is effective in prolonging life requires proof that survival has been  
33 extended, by metastasectomy, beyond that which would have occurred without  
34 pulmonary metastasectomy. Cost effectiveness requires, in addition to survival,  
35 measures of health gained, measures of health lost due to death and complications, and  
36 for these to be costed in comparison with any alternatives, including no treatment. This  
37 third measure, estimation of cost effectiveness is outside the scope of this review and  
38 depends on first establishing effectiveness.

39 Evaluation of the effectiveness in preventing or postponing death by pulmonary  
40 metastasectomy is the common objective in these clinical reports. The existing practice  
41 is believed to be effective based on repeated experience world wide for over forty years.  
42 In 1971 thoracic surgeons at Memorial Sloane Kettering reported on 22 patients with  
43 treated osteogenic sarcoma in whom they performed lung resections. [32] The meticulous  
44 case by case communication of that experience merits revisiting. (Fig.2)  
45

46 In the discussion that followed Beattie modestly states:

47 “We reported these data with some reluctance, since they really constitute a progress  
48 report on a clinical research project underway at Memorial Hospital. We used osteogenic  
49 sarcomas because they are such serious tumors. There are occasional spontaneous  
50 regressions and good results; but you saw in the figures Dr. Martini showed that with  
51 amputation we have had a 17% five-year cure rate. Of the 83% of patients who died, 5%  
52 lived three years. Very occasionally a patient would go on longer before dying.”[32]  
53  
54

1  
2  
3  
4  
5  
6  
7  
8  
9 Twenty-years later [33] Beattie reported further:

10 “Twenty-year follow-up reveals that at least four of the six survivors at 10 years survived  
11 more than 19 years; one was lost to follow-up. The patient who died of metastatic  
12 osteogenic sarcoma more than 19 years after her first thoracotomy had a total of nine  
13 thoracotomies.”

14  
15 An implicit assumption is embedded in many subsequent reports that none of these  
16 patients would have lived beyond five years without metastasectomy. There are other  
17 reasons, apart from having had pulmonary metastasectomy, for patients with pulmonary  
18 metastatic disease to be alive at and beyond five years. These patients are carefully  
19 selected and although it is not possible to put a reliable figure on it, they are a minority of  
20 all patients with the disease.[2] (Table 1) It is appropriate to select patients for surgery  
21 and yet comments such as— “survival of (surgically treated) patients was significantly  
22 better than of patients ineligible for metastasectomy.  $P < 0.00001$ ”[14] is not an  
23 appropriate or meaningful statistical comparison: the difference is evident but how much  
24 is due to the selection and how much to the surgery, cannot be determined.

25  
26 The identifiable factors for selection of suitable patients include fewer metastases and a  
27 longer interval between the diagnosis and treatment of the primary and the resection of  
28 pulmonary metastases.[34,35] Others which appear in some analyses are tumour doubling  
29 time and the size of the nodule(s) which under surveillance is a proxy for rate of growth.  
30 These are prognostic features for survival under any circumstance. We also know from  
31 the Thames Cancer Registry data that there are 20-25% of patients with osteosarcoma  
32 and about 15% with soft tissues sarcoma, with metastases at the time of registration, who  
33 are alive beyond five years. (Table 6) The narrative accounts record that there are some  
34 natural long term survivors: “one patient not operated on remains alive 18 years after not  
35 having surgery.”[14] “Long-term survivors appear to belong to a subset of patients with  
36 indolent, lung-only disease.”[36] These natural survivors, who are likely to have slower  
37 progression, and fewer metastases, are likely to be disproportionately frequent amongst  
38 patients selected for metastasectomy [37] as seen in the graphical depiction, for the  
39 selection process is not random. (Fig.6). More than thirty years ago Aberg first proposed  
40 that selection might be the major factor determining survival after pulmonary  
41 metastasectomy [38] and returned to this question in 1997. [39] It is of note that none of  
42 the authors cite Aberg. It is known that “citation distortions create unfounded authority”  
43 [40] and citation network analysis.[41]

44 In fact the effect of selection may easily be underestimated. Multivariable analysis  
45 cannot detect more than a limited number of factors in these relatively small series. All  
46 of these factors may exhibit covariance and they are all indices of the relative  
47 aggressiveness of a cancer. Failure for one or more of these factors to reach significance  
48 in any particular Cox model does not refute the overall finding. Furthermore, if the  
49 knowledge of previous finding leads to the exclusion of some patients, the range of that  
50 variable is reduced and it is less likely to be found in subsequent analyses. [42]

1  
2  
3  
4  
5  
6  
7  
8  
9 In this group of young and therefore physically resilient patients there seems to be a  
10 strong desire to never say no, and to push the boundaries for selection for  
11 metastasectomy. It is well established that patients with more metastases are unlikely to  
12 live long after metastasectomy. Nevertheless there is no apparent upper limit in many of  
13 the reports nor was there for 85% of surgeons in the ESTS survey.[6] Amongst the  
14 reports pulmonary metastasectomy in the present systematic review some surgeons report  
15 very high numbers of metastases resected. For example “The authors have removed as  
16 many as 80 to 100 nodules during a single thoracotomy” [22] and in the COSS report  
17 “The highest number of pulmonary nodules surgically removed was 250”[1] are out of  
18 line with the observational evidence that above a count of relatively few metastases,  
19 outcomes are too poor to justify this surgery. Maybe these high numbers reflect the  
20 observation that the preoperative count of nodules underestimates the true extent of the  
21 disease “It is interesting that despite the presence of only three or four nodules on many  
22 CT scans, up to 50 or more nodules were found and removed in a number of these  
23 patients.”[22] The issue of the relative reliability of modern imaging versus surgeons’  
24 palpation of the lung has been considered elsewhere with varying conclusions.

25 The extent of necrosis caused by chemotherapy evident in the excised nodule was found  
26 to be a favourable feature for survival.[10] The clinical response or failure to respond to  
27 chemotherapy was given as factor in selection in several series. Both of these  
28 observations are evidence that chemotherapy is having an effective in these patients and  
29 has had a demonstrable effect on their disease. Why then should a survival difference be  
30 attributed to the surgery?

31 There is a firm belief that if sarcoma recurs in the lungs, and the patient is still within the  
32 criteria for resection, further resections should be performed. “The authors concluded  
33 that patients persistently free of the primary osteosarcoma who developed recurrent  
34 resectable metastatic disease of the lung should be considered for reoperation a second,  
35 third, or fourth time, as these patients had similar DFI curves after five-years.”[26] This  
36 belief is supported by what might be inappropriate data interpretation. Consider these  
37 statements for example: “Prognostic factors for increased survival included 3 or greater  
38 redo pulmonary operations”[23]; “patients with complete resection for recurrent  
39 pulmonary metastasis show a significantly better prognosis after repeat pulmonary  
40 metastasectomy”[27] and “repeat metastasectomy for recurrent pulmonary metastasis  
41 also provided a favorable overall survival ( $P < 0.041$ )”.[20] To undergo a second  
42 metastasectomy a patient has to have survived, and been without evidence of disease for  
43 a reasonable length of time, to meet the criteria for each subsequent operation. The  
44 problem is exemplified by Sardenberg and colleagues. Survival was measured from the  
45 first thoracotomy for pulmonary metastasectomy (confirmed with the first author) and  
46 was 15 months, 45 months and 48 months, in 35 patients having only one surgical  
47 episode, 24 who had two and 13 who had three. The authors provide a statistical analysis  
48 ( $P=0.077$ ) of the association between more thoracotomies and longer survival. They  
49 neglect the fact in their interpretation that survival after surgery, and for a reasonable  
50 period of time, was a requirement to move to the next analytical group.[19] This way of  
51 presenting the data maximizes survivor bias: ongoing survival is an entry criterion to  
52 having a further metastasectomy operation.

We found no of data, or even a narrative account, concerning the effect of surgery on symptoms. The patients who are regarded as candidates for metastasectomy are generally detected on surveillance and presentation with symptoms probably distinguishes patients as being not suitable for metastasectomy, either because it represents extrapulmonary disease of the pulmonary disease is too advanced. The evidence [cited in NICE guidance\[3\] is as follows](#): “Detection on the basis of symptoms occurred in 21 patients. Fifteen of these patients presented between scheduled visits. Seven patients were symptomatic primarily on the basis of their metastatic pulmonary disease. These patients had diffuse metastatic disease in all cases, with documented synchronous recurrence outside the lung, and none was resectable.”[5] What is implicit in many of the reports reviewed is that ultimately they call a halt to repeated thoractomies because the patient respiratory function will not withstand further surgery and loss of lung tissue.

[Two publications\[45,46\] which appeared in 2011 after completion of our review and data analysis, and following submission, have been brought to our attention. They come from prominent North American institutions and appeared in a specialist thoracic surgical journal Annals of Thoracic surgery. The report from Brigham and Women’s Hospital, Boston, Massachusetts states in its title “Repeated and aggressive pulmonary resections for leiomyoma metastases extends survival”. The report is of 82 patients with a variety of bone and soft tissues sarcomas between 1989-2004. Repeat metastasectomy was performed in 28/82 with some patients having 3, 4 or 5 thoracic operations. Operated patients with leiomyosarcoma 31/82 had a median survival of 70 months compared with 24 months for other sarcoma subtypes. No control data for survival amongst comparable patients not operated upon are provided. The text confirms that the surgery was repeated and aggressive but that survival was extended as a result cannot be inferred from the data presented for the reasons given already. The report from Massachusetts General Hospital is of 97 patients with 13 sarcoma subtypes operated on for pulmonary metastases between 2002 and 2008.\[46\] They report that of 69% of 29 patients who had multiple operations were alive at five years compared with 41% of 60 patients who had a single operation and find the difference to be statistically significant and the bottom line of the conclusions reads “Repeated pulmonary metastasectomy in select patients may improve survival despite recurrent disease.” But patients have first to be survivors to be candidates for surgery, a point the authors make themselves in their discussion “Patients in whom disease rapidly recurred after surgery \(either as a local recurrence or disseminated disease\) were probably selected out from repeated surgical resection.”\[46\] Neither of these papers provides evidence on symptomatic benefit for these patients.](#)

While there are some long term survivors amongst those who have this surgery the absence of control data leaves Aberg’s challenge[38,39] unrefuted. [His hypothesis was that patients The possibility remains that practice is to select for surgery those who were destined to survive longer are more likely to be selected for surgery and it is the process of selection, rather than the effect of pulmonary metastasectomy, that is responsible for any survival difference perceived, and to reviews presented attribute the longer survival inherent in the selected patients to the pulmonary surgery rather than to the selection for that surgery.](#) Although [it would be](#) challenging to perform, a randomised controlled trial

**Formatted:** Font: (Default) Times New Roman, 12 pt, Not Bold

**Formatted:** Font: (Default) Times New Roman, 12 pt, Not Bold

**Formatted:** Font: (Default) Times New Roman, 12 pt, Not Bold

**Formatted:** Font: (Default) Times New Roman, 12 pt, Not Bold

1  
2  
3  
4  
5  
6  
7  
8  
9  
10  
11  
12  
13  
14  
15  
16  
17  
18  
19  
20  
21  
22  
23  
24  
25  
26  
27  
28  
29  
30  
31  
32  
33  
34  
35  
36  
37  
38  
39  
40  
41  
42  
43  
44  
45  
46  
47  
48  
49  
50  
51  
52  
53  
54  
55  
56  
57  
58  
59  
60

may be necessary if we are to see the signal from the noise in this area of clinical practice.

For peer review only

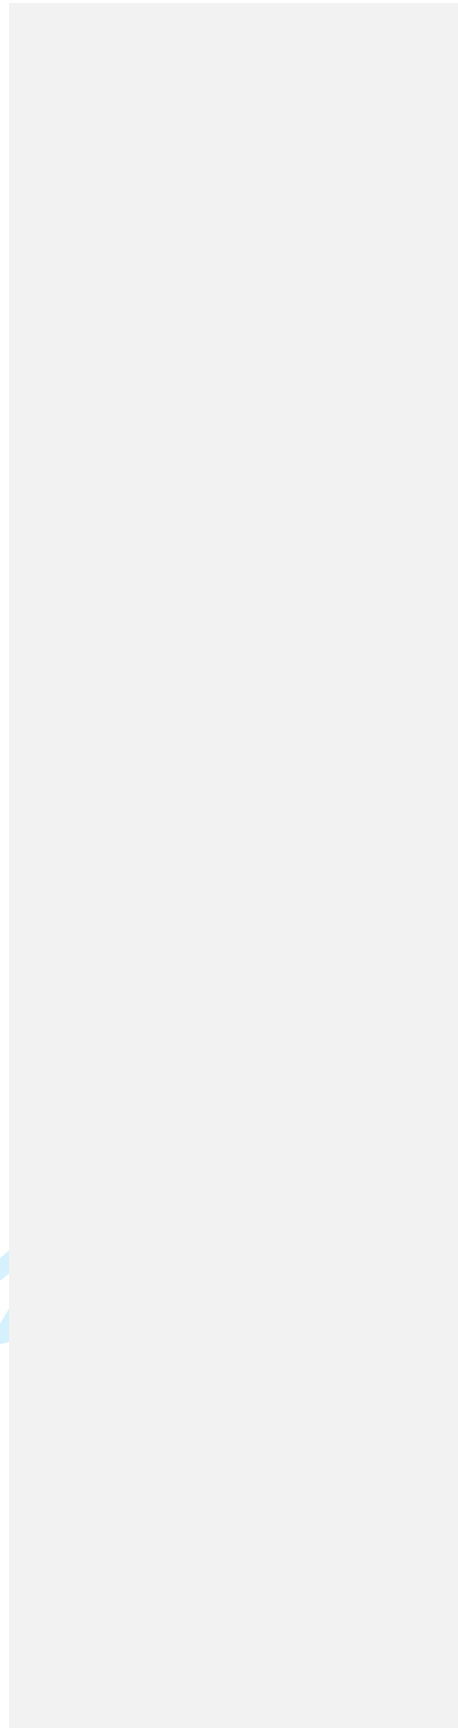



1  
2  
3  
4  
5  
6  
7  
8  
9  
10  
11  
12  
13  
14  
15  
16  
17  
18  
19  
20  
21  
22  
23  
24  
25  
26  
27  
28  
29  
30  
31  
32  
33  
34  
35  
36  
37  
38  
39  
40  
41  
42  
43  
44  
45  
46  
47  
48  
49  
50  
51  
52  
53  
54  
55  
56  
57  
58  
59  
60

### Legends to figures

#### Figure 1

Thames Cancer Registry data. Kaplan Meier survival plots by stage for decades 1985-1994 (above) and 1995-2004 (below) for bone (left) and soft tissue sarcoma (right). Stage 4 (that is metastasised at the time of diagnosis/registration) in red.

#### Figures 2

Five year survival rates plotted against the publication date.

#### Figure 3

Five year survival rates plotted against the size of the series.

#### Figure 4

Three and five year survival rates from publications in Table 6. (Bone sarcoma red, soft tissue sarcoma green and mixed series blue.)

#### Figure 5

The full display of essential features of the patients and their with survival from primary resection to metastasectomy and subsequently. From Martini et al 1971

#### Figure 6

A conservative estimate of natural five year survivors is set at 5% (15/300 in this depiction) and they are in green. Ranking patients on the Y and X axes from least to most favourable based on fewer metastases and longer interval since diagnosis might have the effect of clustering these natural survivors as shown. If selection for surgery is also based on these factors, it might be the selection rather than the surgery which is associated with a higher than anticipated survival rate shown here as 10/25 or 40%.

1  
2  
3  
4  
5  
6  
7  
8  
9  
10  
11  
12  
13  
14  
15  
16  
17  
18  
19  
20  
21  
22  
23  
24  
25  
26  
27  
28  
29  
30  
31  
32  
33  
34  
35  
36  
37  
38  
39  
40  
41  
42  
43  
44  
45  
46  
47  
48  
49  
50  
51  
52  
53  
54  
55  
56  
57  
58  
59  
60

|

For peer review only

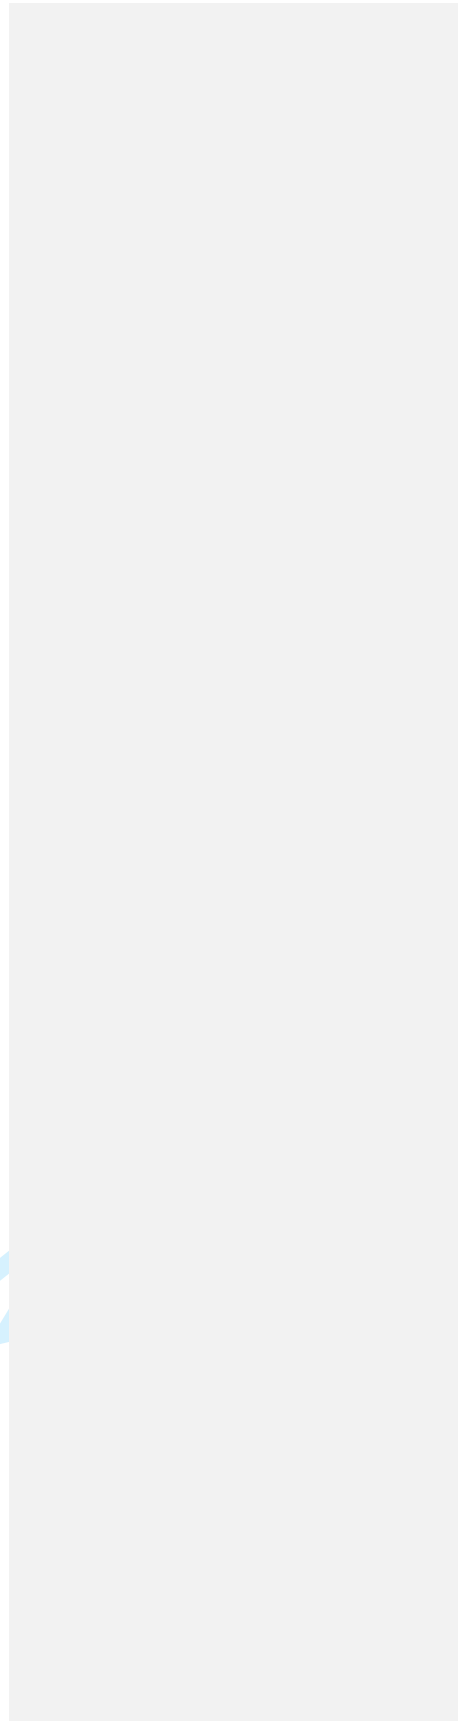

1  
2  
3  
4  
5  
6  
7  
8  
9  
10  
11  
12  
13  
14  
15  
16  
17  
18  
19  
20  
21  
22  
23  
24  
25  
26  
27  
28  
29  
30  
31  
32  
33  
34  
35  
36  
37  
38  
39  
40  
41  
42  
43  
44  
45  
46  
47  
48  
49  
50  
51  
52  
53  
54  
55  
56  
57  
58  
59  
60

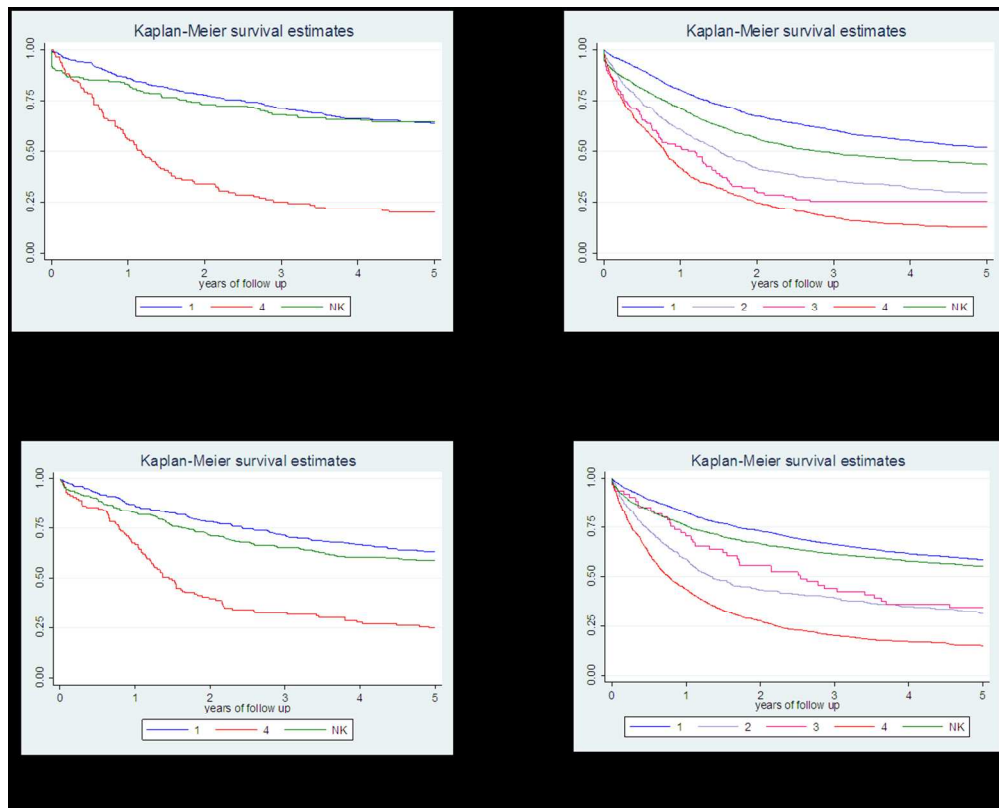

Figure 1  
Thames Cancer Registry data. Kaplan Meier survival plots by stage for decades 1985-1994 (above) and 1995-2004 (below) for bone (left) and soft tissue sarcoma (right). Stage 4 (that is metastasised at the time of diagnosis/registration) in red.

214x172mm (150 x 150 DPI)

only

1  
2  
3  
4  
5  
6  
7  
8  
9  
10  
11  
12  
13  
14  
15  
16  
17  
18  
19  
20  
21  
22  
23  
24  
25  
26  
27  
28  
29  
30  
31  
32  
33  
34  
35  
36  
37  
38  
39  
40  
41  
42  
43  
44  
45  
46  
47  
48  
49  
50  
51  
52  
53  
54  
55  
56  
57  
58  
59  
60

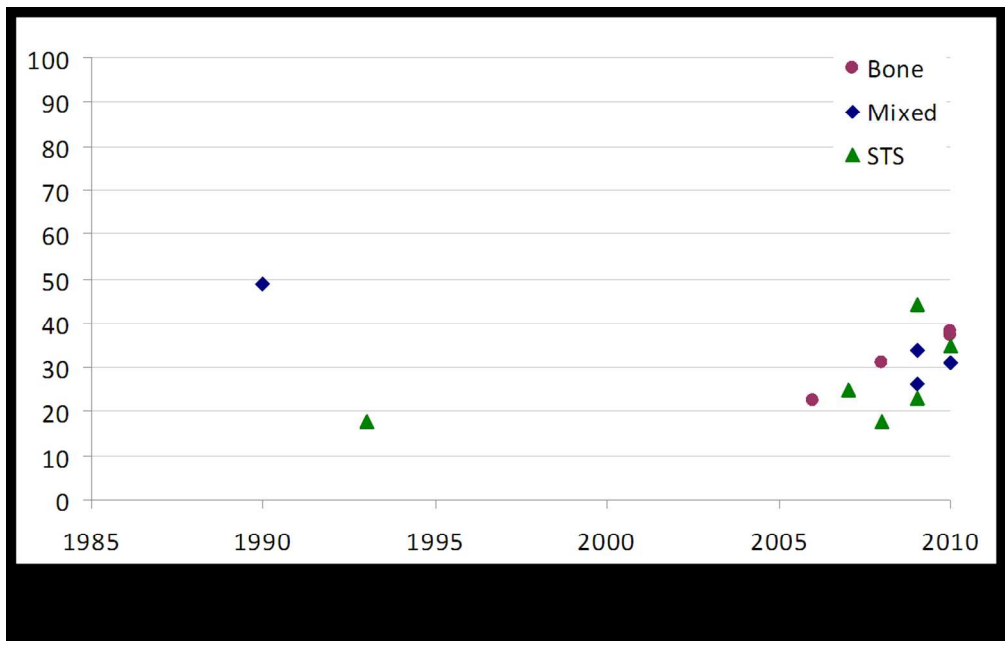

Figures 2  
Five year survival rates plotted against the publication date.

228x144mm (150 x 150 DPI)

view only

1  
2  
3  
4  
5  
6  
7  
8  
9  
10  
11  
12  
13  
14  
15  
16  
17  
18  
19  
20  
21  
22  
23  
24  
25  
26  
27  
28  
29  
30  
31  
32  
33  
34  
35  
36  
37  
38  
39  
40  
41  
42  
43  
44  
45  
46  
47  
48  
49  
50  
51  
52  
53  
54  
55  
56  
57  
58  
59  
60

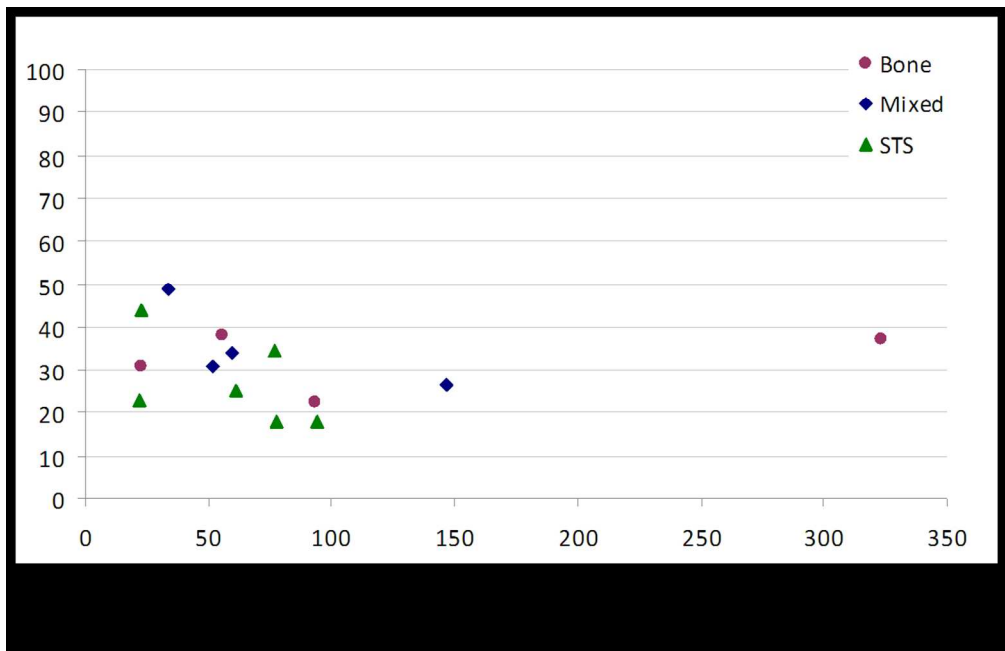

Figure 3  
Five year survival rates plotted against the size of the series.

224x144mm (150 x 150 DPI)

View only

1  
2  
3  
4  
5  
6  
7  
8  
9  
10  
11  
12  
13  
14  
15  
16  
17  
18  
19  
20  
21  
22  
23  
24  
25  
26  
27  
28  
29  
30  
31  
32  
33  
34  
35  
36  
37  
38  
39  
40  
41  
42  
43  
44  
45  
46  
47  
48  
49  
50  
51  
52  
53  
54  
55  
56  
57  
58  
59  
60

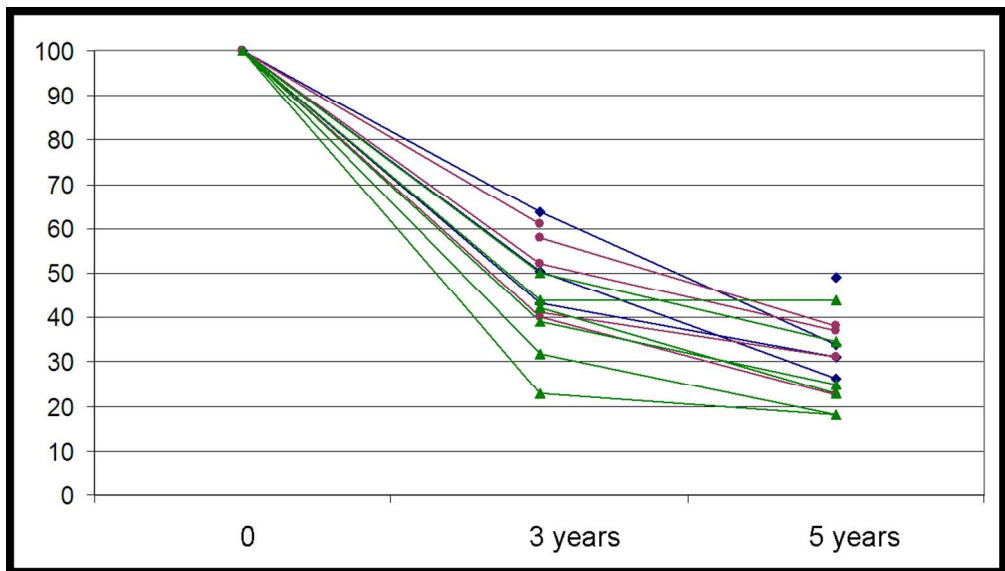

Figure 4  
Three and five year survival rates from publications in Table 6. (Bone sarcoma red, soft tissue sarcoma green and mixed series blue.)

226x127mm (150 x 150 DPI)

Review only

1  
2  
3  
4  
5  
6  
7  
8  
9  
10  
11  
12  
13  
14  
15  
16  
17  
18  
19  
20  
21  
22  
23  
24  
25  
26  
27  
28  
29  
30  
31  
32  
33  
34  
35  
36  
37  
38  
39  
40  
41  
42  
43  
44  
45  
46  
47  
48  
49  
50  
51  
52  
53  
54  
55  
56  
57  
58  
59  
60

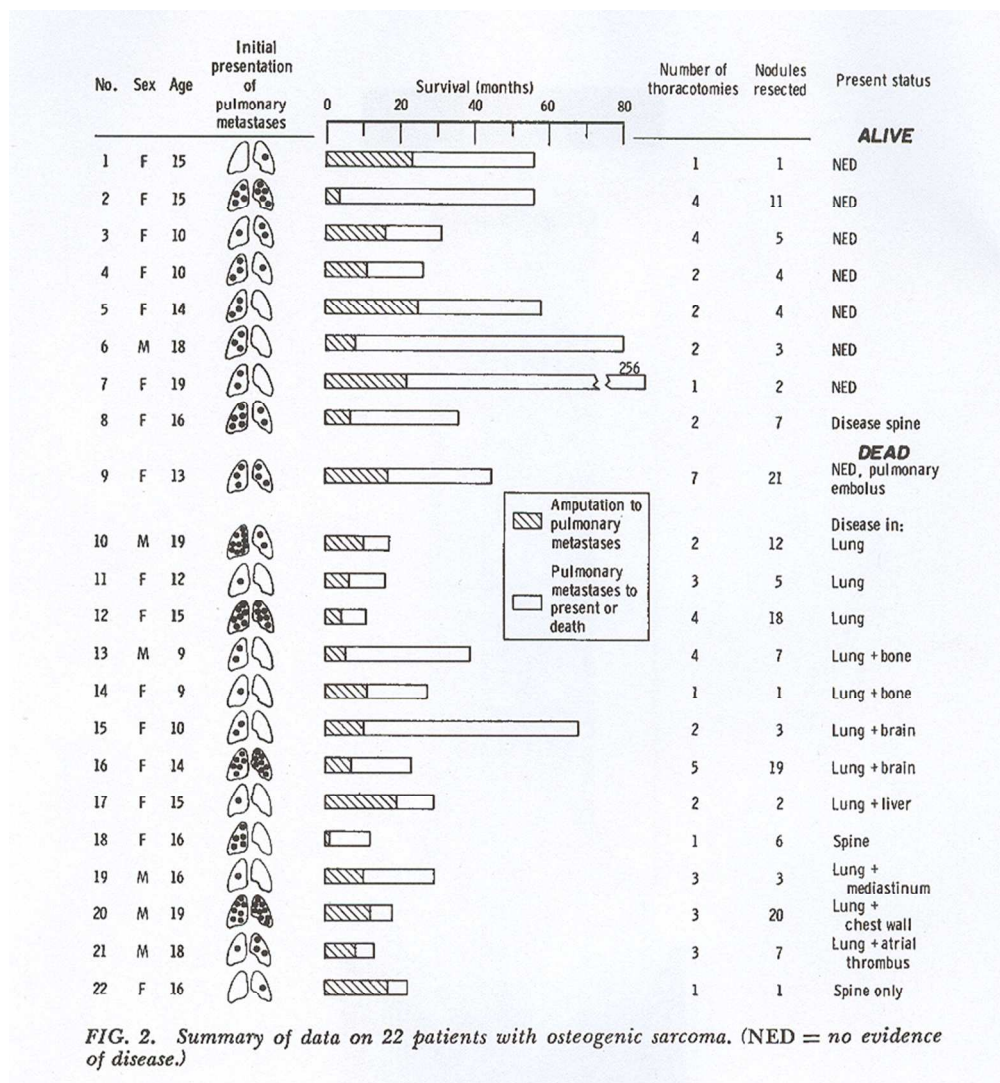

Figure 5  
The full display of essential features of the patients and their with survival from primary resection to metastasectomy and subsequently. From Martini et al 1971

150x161mm (150 x 150 DPI)

1  
2  
3  
4  
5  
6  
7  
8  
9  
10  
11  
12  
13  
14  
15  
16  
17  
18  
19  
20  
21  
22  
23  
24  
25  
26  
27  
28  
29  
30  
31  
32  
33  
34  
35  
36  
37  
38  
39  
40  
41  
42  
43  
44  
45  
46  
47  
48  
49  
50  
51  
52  
53  
54  
55  
56  
57  
58  
59  
60

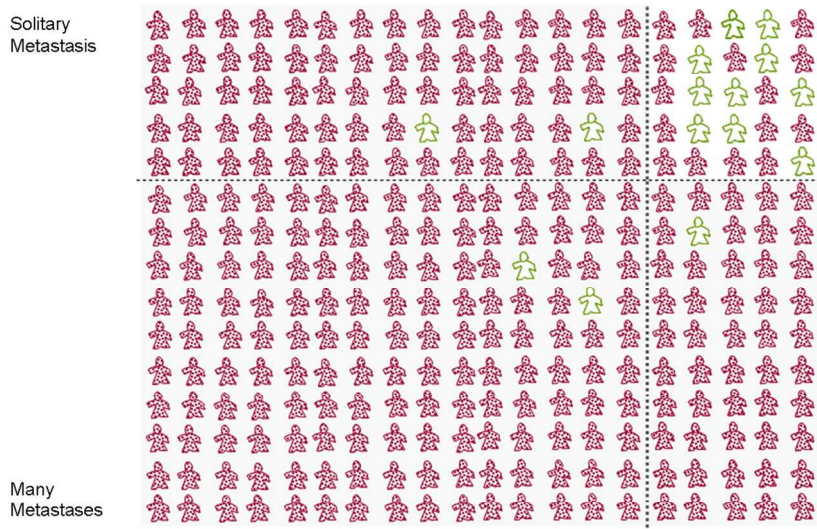

Increasing interval between 1o diagnosis and appearance of pulmonary metastases

Figure 6

A conservative estimate of natural five year survivors is set at 5% (15/300 in this depiction) and they are in green. Ranking patients on the Y and X axes from least to most favourable based on fewer metastases and longer interval since diagnosis might have the effect of clustering these natural survivors as shown. If selection for surgery is also based on these factors, it might be the selection rather than the surgery which is associated with a higher than anticipated survival rate shown here as 10/25 or 40%.

235x176mm (150 x 150 DPI)

only



| Publication   | Histo | Start Date | End Date | All registered sarcoma patients<br>A | Patients with pulmonary metastases<br>B | Pulmonary Metastases as reported in cited papers in systematic review<br>C | Proportion of sarcoma patients with pulmonary metastases<br>(=B/A) | Proportion of Patients with pulmonary metastases who have metastasectomy (data as in reports)<br>(=C/B) | Proportion of all sarcoma patients who have pulmonary metastectomy<br>(=C/A) |
|---------------|-------|------------|----------|--------------------------------------|-----------------------------------------|----------------------------------------------------------------------------|--------------------------------------------------------------------|---------------------------------------------------------------------------------------------------------|------------------------------------------------------------------------------|
| Antunes 1999  | Bone  | 1989       | 1997     | 198 <sup>a</sup>                     |                                         | 31                                                                         |                                                                    |                                                                                                         | 16%                                                                          |
| Harting 2006  | Bone  | 1980       | 2000     | 272 <sup>b</sup>                     | 137 <sup>c</sup>                        | 99                                                                         | 50%                                                                | 72%                                                                                                     | 36%                                                                          |
| Briccoli 2010 | Bone  | 1985       | 2005     | 1197 <sup>d</sup>                    | 369 <sup>e</sup>                        | 323                                                                        | 31%                                                                | 88%                                                                                                     | 27%                                                                          |
| Buddingh 2009 | Bone  | 1990       | 2008     | 197 <sup>f</sup>                     | 88 <sup>g</sup>                         | 56                                                                         | 45%                                                                | 64%                                                                                                     | 28%                                                                          |
| Gadd 1993     | STS   | 1983       | 1990     | 716 <sup>h</sup>                     | 135 <sup>i</sup>                        | 78                                                                         | 19%                                                                | 58%                                                                                                     | 11%                                                                          |
| Rehders 2007  | STS   | 1991       | 2002     | 678 <sup>j</sup>                     | 121 <sup>k</sup>                        | 61                                                                         | 18%                                                                | 50%                                                                                                     | 9%                                                                           |
| Blackmon 2009 | Mixed | 1998       | 2006     | 15744 <sup>l</sup>                   | 4355 <sup>m</sup>                       | 234                                                                        | 28%                                                                | 5%                                                                                                      | 1%                                                                           |

Table 1 Data from reports providing the number of patients from which the study population was derived

<sup>a</sup>patients operated on for osteogenic sarcomas of the limbs were followed in their centre

<sup>b</sup>patients with osteosarcoma of the trunk or extremities who were younger than 21 years and who had medical records available for review

<sup>c</sup>developed or presented with radiographically evident pulmonary nodules. These 137 patients formed the initial study cohort.

<sup>d</sup>patients with histologically proven HGOS of the extremity 55 years old or younger diagnosed at their Institution

<sup>e</sup>first recurrence with metastases located only in the lung

<sup>f</sup>patients under the age of 40 treated for high-grade OS at the Leiden University Medical Center

<sup>g</sup>patients who had pulmonary metastases either at diagnosis or during follow-up

<sup>h</sup>adult patients with a primary or locally recurrent extremity soft tissue sarcoma admitted to MSKCC

<sup>i</sup>patients with pulmonary metastases

<sup>j</sup>patients with STS were treated at the Department of Surgery, University Hospital

<sup>k</sup>pulmonary metastasis of STS occurred during follow-up,

<sup>l</sup>patients with soft tissue and bone sarcoma referred to The University of Texas M.D. Anderson Cancer Center

<sup>m</sup>patients diagnosed with sarcomatous pulmonary metastases

| Author             | Sarcoma patients who have pulmonary metastasectomy (N) | Age mean (years) | Age range (years) | Sex Males | Sex %male | Median interval between primary and metastases (months) | Range (months) | Mean number of mets resected | Range |
|--------------------|--------------------------------------------------------|------------------|-------------------|-----------|-----------|---------------------------------------------------------|----------------|------------------------------|-------|
| Bone               |                                                        |                  |                   |           |           |                                                         |                |                              |       |
| Antunes 1999       | 31                                                     | 25               | 10-54             | 21        | 68%       | 22                                                      | 4-122          | 3.2                          | 1-8   |
| Harting 2006       | 99                                                     | 13.9             | +/- 4.2           | 67        | 68%       | 0 in 17%                                                | 0-NF           |                              | 1->10 |
| Briccoli 2010      | 323                                                    | 16               | 4-55              | 201       | 62%       | NF                                                      |                | NF                           | NF    |
| Chen 2008          | 23                                                     | 19               | 6-68              | 15        | 65%       | 19                                                      | 0-108          | 5.0                          |       |
| Buddingh 2010      | 56                                                     | NF               | NF                | 40        | 71%       | NF                                                      |                |                              |       |
| Soft Tissue        |                                                        |                  |                   |           |           |                                                         |                |                              |       |
| Gadd 1993          | 78                                                     | (55)*            | 17-85             | NF        |           | 14                                                      | 1-152          | NF                           | NF    |
| Smith 2009         | 94                                                     | 49               | 9-75              | 47        | 50%       | 15                                                      | 0-NF           | 2.5                          | 1-105 |
| Rehders 2007       | 61                                                     | 42               | 18-47             | 33        | 54%       | 21                                                      | 0-3            | 5.0                          | 1-48  |
| Garcia Franco 2009 | 22                                                     | 41               | 13-82             | 10        | 45%       | 18                                                      | 5-84           |                              |       |
| Sardenberg 2010    | 77                                                     | 45               | NF                | 37        | 48%       | NF                                                      |                | 3.5                          |       |
| Chen 2009          | 23                                                     | 53               | 15-86             | 12        | 52%       | NF                                                      | 0-168          |                              |       |
| Mixed              |                                                        |                  |                   |           |           |                                                         |                |                              |       |
| Snyder 1991        | 34                                                     | 23               | NF                | 20        | 59%       | 19                                                      | <6->24         | 11                           | NF    |
| Blackmon 2009      | 234                                                    | <50*             |                   | 123       | 53%       | Varied                                                  | NF             | NF                           | NF    |
| Gossot 2009        | 60                                                     | 40               |                   | 34        | 57%       | 18                                                      | NF             | NF                           | NF    |
| Garcia franco 2010 | 52                                                     | 20               | 5-74              | 31        | 60%       | 20                                                      | 5-189          | NF                           | NF    |

Table 2 Summary data on 15 papers reporting on series of patient undergoing a first pulmonary metastasectomy operation for sarcoma.

\* median age

NF means data were not found

| Series             | N   |       | Multiple |
|--------------------|-----|-------|----------|
|                    | 1st | N 2nd |          |
| Rehders 2007       | 61  | 13    | 21%      |
| Antunes 1999       | 31  | 8     | 26%      |
| Garcia franco 2010 | 52  | 16    | 31%      |
| Garcia Franco 2009 | 22  | 7     | 32%      |
| Chen (EJSO) 2009   | 23  | 8     | 35%      |
| Smith 2009         | 94  | 33    | 35%      |
| Briccoli 2005      | 267 | 94    | 35%      |
| Briccoli 2010      | 323 | 122   | 38%      |
| Buddingh 2010      | 56  | 26    | 46%      |
| Sardenberg 2010    | 77  | 37    | 48%      |
| Gossot 2009        | 60  | 33    | 55%      |
| Blackmon 2009      | 234 | 141   | 60%      |
| Chen (EJCTS) 2008  | 23  | 14    | 61%      |
| Snyder 1991        | 34  | 28    | 82%      |

Table 3. The proportion of patients who have second or subsequent metastasectomy. This does not include staged bilateral thoracotomies which are regarded as a single intervention. Reports are ranked according to the proportion having second and subsequent metastasectomy interventions. Sequential staged operations (for example lateral thoracotomies planned with an interval of 1-3 weeks) are considered by the authors as a single episode of treatment.

| Report             | Surgical approach                                                                                           | Surgical technique                                                                                |
|--------------------|-------------------------------------------------------------------------------------------------------------|---------------------------------------------------------------------------------------------------|
| Snyder 1991        | Thoractomy<br>Bilateral disease staged thoracotomy, 1-2 weeks interval 16/34                                | Enucleation                                                                                       |
| Antunes 1999       | Thoracotomy 30/31<br>Median sternotomy 1/31                                                                 | Enucleation<br>Wedge resection<br>Lobectomy                                                       |
| Harting 2006       | Thoracotomy,<br>Staged or simultaneous bilateral thoracotomies<br>Median sternotomy                         |                                                                                                   |
| Briccoli 2010      | Thoracotomy<br>Bilateral thoracotomies                                                                      | Wedge resection<br>Lobectomy<br>Pneumonectomy                                                     |
| Garcia Franco 2010 | Thoracotomy 30/52<br>Sequential bilateral thoracotomy 7/52<br>VATS) 10/52<br>Clamshell 5/52                 | Wedge 44/52<br>Lobectomy 6/52<br>Exploratory thoracotomies 2/52 <sup>i</sup>                      |
| Chen 2008          | Thoracotomy                                                                                                 | Wedge 22/23<br>Lobe 1/23                                                                          |
| Smith 2009         |                                                                                                             | Wedge 74/94<br>Lobectomy 17/94<br>Pneumonectomy 3/94<br>Resection of other thoracic disease 16/94 |
| Rehders 2007       | Thoracotomy 29 (48)<br>Bilateral thoracotomy, 2 sessions 10 (16) <sup>ii</sup><br>Median sternotomy 22 (36) | Wedge resection 52 (85)<br>Lobectomy 9 (15)                                                       |
| Garcia Franco 2009 | Thoracotomy 19<br>VATS 2<br>Sternotomy 1                                                                    | Wedge 19<br>Lobectomy 3                                                                           |
| Sardenberg 2010    | Thoracotomy<br>Staged bilateral thoracotomy                                                                 | Complete resection with 10mm margin                                                               |
| Chen EJSO 2009     |                                                                                                             | Wedge resection 21/23<br>Lobectomy 1/23<br>Pneumonectomy 1/23                                     |
| Gossott 2009       | Thoracotomy 29<br>VATS 31<br>In a comparative study of the two approaches                                   |                                                                                                   |

Table 4 Surgical approaches and resection techniques in reports of 1<sup>st</sup> time pulmonary metastasectomy

<sup>i</sup> That is to say no resection of sarcoma was performed in these patients.

<sup>ii</sup> These patients have planned sequential operations about two weeks apart and it is regarded as a single intervention as opposed to a repeat metastasectomy operation.

|                                                           | Bone |      | STS   |      |
|-----------------------------------------------------------|------|------|-------|------|
|                                                           | N    | %    | N     | %    |
| Total removal of organ, or operation stated to be radical | 145  | 8%   | 3203  | 21%  |
| Partial or debulking operations on the primary tumour     | 648  | 35%  | 4935  | 32%  |
| Lymphadenectomy                                           | 2    | 0.1% | 171   | 1%   |
| Non-tumour removing surgical treatment                    | 160  | 9%   | 245   | 2%   |
| Haematological procedure (e.g. bone marrow transplant)    | 2    | 0.1% | 19    | 0.1% |
| Investigative procedure only                              | 298  | 16%  | 2072  | 14%  |
| Type of surgery not known                                 | 11   | 1%   | 59    | 0.4% |
| No surgery recorded                                       | 581  | 31%  | 4559  | 30%  |
|                                                           | 1847 | 100% | 15263 | 100% |

Table 5 Highest Surgery Code of Thames Cancer Registry sarcoma patients 1985-2008

| Author             | Sarcoma patients who have pulmonary metastasectomy (N) | Five year survival where provided | Middle date of metastasectomy series and date ranges for TCR |
|--------------------|--------------------------------------------------------|-----------------------------------|--------------------------------------------------------------|
| <b>Bone</b>        |                                                        |                                   |                                                              |
| Harting 2006       | 93                                                     | 23%                               | 1991                                                         |
| Briccoli 2010      | 323                                                    | 37%                               | 1996                                                         |
| Chen (EJCTS) 2008  | 23                                                     | 31%                               | 1999                                                         |
| Buddingh 2010      | 56                                                     | 38%                               | 2000                                                         |
| TCR                |                                                        | 20%                               | 1985-1994                                                    |
| TCR                |                                                        | 25%                               | 1995-2004                                                    |
| <b>Soft Tissue</b> |                                                        |                                   |                                                              |
| Gadd 1993          | 78                                                     | 18%                               | 1987                                                         |
| Smith 2009         | 94                                                     | 18%                               | 1989                                                         |
| Rehders 2007       | 61                                                     | 25%                               | 1997                                                         |
| Sardenberg 2010    | 77                                                     | 35%                               | 1999                                                         |
| Chen (EJSO) 2009   | 23                                                     | 44%                               | 1999                                                         |
| Garcia Franco 2009 | 22                                                     | 23%                               | 2002                                                         |
| TCR                |                                                        | 13%                               | 1985-1994                                                    |
| TCR                |                                                        | 15%                               | 1995-2004                                                    |
| <b>Mixed</b>       |                                                        |                                   |                                                              |
| Snyder 1991        | 34                                                     | 49%                               | 1984                                                         |
| Garcia franco 2010 | 52                                                     | 31%                               | 2002                                                         |
| Blackmon 2009      | 234                                                    | 26%                               | 2003                                                         |
| Gossot 2009        | 60                                                     | 34%                               | 2004                                                         |

Table 6 Five years survival and Thames Cancer Registry summary data

Five year survival from 14 of the 15 studies reporting first (and subsequent) pulmonary metastasectomy operations. They are grouped by sarcoma type and then by mid year of the series to aid visual inspection for time trends. Thames Cancer Registry (TCR) five year survival data for Stage 4 patients are provided for two complete decades of data overlapping the reported series. These TCR patients all had metastases at presentation but not necessarily lung or lung only.

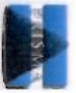

## PRISMA 2009 Checklist

| Section/topic                      | #  | Checklist item                                                                                                                                                                                                                                                                                              | Reported on page # |
|------------------------------------|----|-------------------------------------------------------------------------------------------------------------------------------------------------------------------------------------------------------------------------------------------------------------------------------------------------------------|--------------------|
| <b>TITLE</b>                       |    |                                                                                                                                                                                                                                                                                                             |                    |
| Title                              | 1  | Identify the report as a systematic review, meta-analysis, or both.                                                                                                                                                                                                                                         | 1                  |
| <b>ABSTRACT</b>                    |    |                                                                                                                                                                                                                                                                                                             |                    |
| Structured summary                 | 2  | Provide a structured summary including, as applicable: background; objectives; data sources; study eligibility criteria; participants; and interventions; study appraisal and synthesis methods; results; limitations; conclusions and implications of key findings; systematic review registration number. | 3                  |
| <b>INTRODUCTION</b>                |    |                                                                                                                                                                                                                                                                                                             |                    |
| Rationale                          | 3  | Describe the rationale for the review in the context of what is already known.                                                                                                                                                                                                                              | 4-5                |
| Objectives                         | 4  | Provide an explicit statement of questions being addressed with reference to participants, interventions, comparisons, outcomes, and study design (PICOS).                                                                                                                                                  |                    |
| <b>METHODS</b>                     |    |                                                                                                                                                                                                                                                                                                             |                    |
| Protocol and registration          | 5  | Indicate if a review protocol exists, if and where it can be accessed (e.g., Web address), and, if available, provide registration information including registration number.                                                                                                                               | N/A                |
| Eligibility criteria               | 6  | Specify study characteristics (e.g., PICOS, length of follow-up) and report characteristics (e.g., years considered, language, publication status) used as criteria for eligibility, giving rationale.                                                                                                      | 5                  |
| Information sources                | 7  | Describe all information sources (e.g., databases with dates of coverage, contact with study authors to identify additional studies) in the search and date last searched.                                                                                                                                  | 5                  |
| Search                             | 8  | Present full electronic search strategy for at least one database, including any limits used, such that it could be repeated.                                                                                                                                                                               | 5                  |
| Study selection                    | 9  | State the process for selecting studies (i.e., screening, eligibility, included in systematic review, and, if applicable, included in the meta-analysis).                                                                                                                                                   | 5                  |
| Data collection process            | 10 | Describe method of data extraction from reports (e.g., piloted forms, independently, in duplicate) and any processes for obtaining and confirming data from investigators.                                                                                                                                  | 5-6                |
| Data items                         | 11 | List and define all variables for which data were sought (e.g., PICOS, funding sources) and any assumptions and simplifications made.                                                                                                                                                                       | 5                  |
| Risk of bias in individual studies | 12 | Describe methods used for assessing risk of bias of individual studies (including specification of whether this was done at the study or outcome level), and how this information is to be used in any data synthesis.                                                                                      | N/A                |
| Summary measures                   | 13 | State the principal summary measures (e.g., risk ratio, difference in means).                                                                                                                                                                                                                               | N/A                |
| Synthesis of results               | 14 | Describe the methods of handling data and combining results of studies, if done, including measures of consistency (e.g., $I^2$ ) for each meta-analysis.                                                                                                                                                   | N/A                |

1  
2  
3  
4  
5  
6  
7  
8  
9  
10  
11  
12  
13  
14  
15  
16  
17  
18  
19  
20  
21  
22  
23  
24  
25  
26  
27  
28  
29  
30  
31  
32  
33  
34  
35  
36  
37  
38  
39  
40  
41  
42  
43  
44  
45  
46  
47  
48  
49  
50  
51  
52  
53  
54  
55  
56  
57  
58  
59  
60

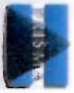

# PRISMA 2009 Checklist

| Section/topic                 | #  | Checklist item                                                                                                                                                                                           | Reported on page # |
|-------------------------------|----|----------------------------------------------------------------------------------------------------------------------------------------------------------------------------------------------------------|--------------------|
| Risk of bias across studies   | 15 | Specify any assessment of risk of bias that may affect the cumulative evidence (e.g., publication bias, selective reporting within studies).                                                             | N/A                |
| Additional analyses           | 16 | Describe methods of additional analyses (e.g., sensitivity or subgroup analyses, meta-regression), if done, indicating which were pre-specified.                                                         | N/A                |
| <b>RESULTS</b>                |    |                                                                                                                                                                                                          |                    |
| Study selection               | 17 | Give numbers of studies screened, assessed for eligibility, and included in the review, with reasons for exclusions at each stage, ideally with a flow diagram.                                          | 6                  |
| Study characteristics         | 18 | For each study, present characteristics for which data were extracted (e.g., study size, PICOS, follow-up period) and provide the citations.                                                             | 5-6-8              |
| Risk of bias within studies   | 19 | Present data on risk of bias of each study and, if available, any outcome level assessment (see item 12).                                                                                                | N/A                |
| Results of individual studies | 20 | For all outcomes considered (benefits or harms), present, for each study: (a) simple summary data for each intervention group (b) effect estimates and confidence intervals, ideally with a forest plot. | 19/28              |
| Synthesis of results          | 21 | Present results of each meta-analysis done, including confidence intervals and measures of consistency.                                                                                                  | N/A                |
| Risk of bias across studies   | 22 | Present results of any assessment of risk of bias across studies (see item 15).                                                                                                                          | N/A                |
| Additional analysis           | 23 | Give results of additional analyses, if done (e.g., sensitivity or subgroup analyses, meta-regression [see item 16]).                                                                                    | N/A                |
| <b>DISCUSSION</b>             |    |                                                                                                                                                                                                          |                    |
| Summary of evidence           | 24 | Summarize the main findings including the strength of evidence for each main outcome; consider their relevance to key groups (e.g., healthcare providers, users, and policy makers).                     | 10-13              |
| Limitations                   | 25 | Discuss limitations at study and outcome level (e.g., risk of bias), and at review-level (e.g., incomplete retrieval of identified research, reporting bias).                                            | 10                 |
| Conclusions                   | 26 | Provide a general interpretation of the results in the context of other evidence, and implications for future research.                                                                                  | 12-13              |
| <b>FUNDING</b>                |    |                                                                                                                                                                                                          |                    |
| Funding                       | 27 | Describe sources of funding for the systematic review and other support (e.g., supply of data); role of funders for the systematic review.                                                               | N/A                |

From: Moher D, Liberati A, Tetzlaff J, Altman DG, The PRISMA Group (2009). Preferred Reporting Items for Systematic Reviews and Meta-Analyses: The PRISMA Statement. PLoS Med 6(6): e1000097. doi:10.1371/journal.pmed1000097

For more information, visit: [www.prisma-statement.org](http://www.prisma-statement.org).



| Year        | Cases | M/F ratio | Median age |
|-------------|-------|-----------|------------|
| Bone        |       |           |            |
| 1985-1994   | 762   | 1.31      | 35         |
| 1995-2004   | 709   | 1.35      | 33         |
| Soft tissue |       |           |            |
| 1985-1994   | 5615  | 0.98      | 56         |
| 1995-2004   | 6256  | 0.82      | 58         |

Figure 7

Sex ratio and median age of patients in Thames Cancer Registry for whom survival data are provided in Table 6.



**Pulmonary metastasectomy for sarcoma: a systematic review of reported outcomes in the context of Thames Cancer Registry data**

|                                 |                                                                                                                                                                                                                                                                                                                                                          |
|---------------------------------|----------------------------------------------------------------------------------------------------------------------------------------------------------------------------------------------------------------------------------------------------------------------------------------------------------------------------------------------------------|
| Journal:                        | <i>BMJ Open</i>                                                                                                                                                                                                                                                                                                                                          |
| Manuscript ID:                  | bmjopen-2012-001736.R1                                                                                                                                                                                                                                                                                                                                   |
| Article Type:                   | Research                                                                                                                                                                                                                                                                                                                                                 |
| Date Submitted by the Author:   | 31-Jul-2012                                                                                                                                                                                                                                                                                                                                              |
| Complete List of Authors:       | Treasure, Tom; UCL, Clinical Operational Research Unit<br>Fiorentino, Francesca; Imperial College, National Heart and Lung Institute (NHLI) Cardiothoracic Surgery<br>Scarci, Marco; Papworth Hospital, Cardiothoracic Surgery<br>Moller, Henrik; Kings College London, Thames Cancer Registry<br>Utley, Martin; UCL, Clinical Operational Research Unit |
| <b>Primary Subject Heading</b>: | Oncology                                                                                                                                                                                                                                                                                                                                                 |
| Secondary Subject Heading:      | Evidence based practice, Surgery                                                                                                                                                                                                                                                                                                                         |
| Keywords:                       | Sarcoma < ONCOLOGY, Cardiothoracic surgery < SURGERY, Adult thoracic medicine < THORACIC MEDICINE                                                                                                                                                                                                                                                        |
|                                 |                                                                                                                                                                                                                                                                                                                                                          |

SCHOLARONE™  
Manuscripts

1  
2  
3 Pulmonary metastasectomy for sarcoma: a systematic review of reported outcomes in the  
4 context of Thames Cancer Registry data  
5  
6

7 Tom Treasure<sup>1</sup>  
8 Francesca Fiorentino<sup>2</sup>  
9 Marco Scarci<sup>3</sup>  
10 Henrik Møller<sup>4</sup>  
11 Martin Utley<sup>1</sup>  
12

13  
14 <sup>1</sup>Clinical Operational Research Unit  
15 UCL (Department of Mathematics)  
16 4 Taviton Street  
17 London WC1H 0BT  
18

19  
20 <sup>2</sup>NHLI Cardiothoracic Surgery  
21 Imperial College London  
22 Hammersmith Hospital Campus  
23 Du Cane Road  
24 London W12 0NN  
25

26  
27 <sup>3</sup>Department of Thoracic Surgery  
28 Papworth Hospital NHS Foundation Trust  
29 Cambridge University Health Partner  
30 Papworth Everard, Cambridge  
31 CB23 3RE  
32 UK  
33

34  
35 <sup>4</sup>King's College London  
36 Thames Cancer Registry  
37 London UK  
38  
39  
40  
41  
42  
43  
44  
45  
46  
47  
48  
49  
50  
51  
52  
53  
54  
55  
56  
57  
58  
59  
60

1  
2  
3 All authors have completed the Unified Competing Interest form at  
4 [http://www.icmje.org/coi\\_disclosure.pdf](http://www.icmje.org/coi_disclosure.pdf) (available on request from the corresponding  
5 author) and declare: no support from any organisation for the submitted work; no  
6 financial relationships with any organisations that might have an interest in the submitted  
7 work in the previous three years, no other relationships or activities that could appear to  
8 have influenced the submitted work.  
9  
10

11  
12 The Corresponding Author has the right to grant on behalf of all authors and does grant  
13 on behalf of all authors, an exclusive licence on a worldwide basis to the BMJ Publishing  
14 Group Ltd and its Licensees to permit this article (if accepted) to be published in BMJ  
15 editions and any other BMJ PGL products and sublicences to exploit all subsidiary rights,  
16 as set out in our licence ( [http://resources.bmj.com/bmj/authors/checklists-forms/licence-](http://resources.bmj.com/bmj/authors/checklists-forms/licence-for-publication)  
17 [for-publication](http://resources.bmj.com/bmj/authors/checklists-forms/licence-for-publication)).  
18  
19

20 There was no funding for this study  
21

#### 22 Contributorship statement

- 23 • Tom Treasure instigated the study, reviewed and revised data extraction, created  
24 the data tables, did a critical textual review, wrote the first draft and edited all  
25 subsequent drafts.
- 26 • Francesca Fiorentino did the initial data extraction and created the final versions  
27 of the figures.
- 28 • Marco Scarci did the initial literature search and subsequent updated literature  
29 searches.
- 30 • Henrik Moller was responsible for identification, extraction and analysis of  
31 comparative data from the Thames Cancer Registry.
- 32 • Martin Utley oversaw data analysis, interpretation and presentation.
- 33 • All authors reviewed the manuscript at each stage and have approved the  
34 submitted version.  
35  
36  
37  
38  
39

#### 40 Acknowledgments:

41 We are grateful to Fergus Macbeth, Penella Woll, Peter Goldstraw and Ian Judson for  
42 reading and commenting helpfully on earlier versions of this manuscript.  
43 At Thames Cancer Register we thank [Marie Horton](#) and [Alexander Massey](#) for data  
44 analysis.  
45  
46

47 We are willing to share data.  
48  
49  
50  
51  
52  
53  
54  
55  
56  
57  
58  
59  
60

## ABSTRACT

Objectives: Sarcoma has a predilection to metastasis to the lungs. Surgical excision of these metastases (pulmonary metastasectomy) when possible has become standard practice. We reviewed the published selection and outcome data.

Design: Systematic review of published reports that include survival rates or any other outcome data. Survival data were compared with those in a cancer registry.

Setting: Specialist thoracic surgical centres reporting the selection and outcome for pulmonary metastasectomy in 18 follow up studies published 1991-2010.

Participants: Patients having one or more of 1357 pulmonary metastasectomy operations performed between 1980 and 2006.

Interventions: All patients had surgical pulmonary metastasectomy. A first operation was reported in 1196 patients. 43% of 1357 patients had subsequent metastasectomy, some having 10 or more thoracotomies. Three studies were confined to patients having repeated pulmonary metastasectomy.

Primary and secondary outcome measures: Survival data to various time points usually five years and sometimes three or ten years. No symptomatic or quality of life data were reported.

Results: 34% and 25% of patients were alive five years after a first metastasectomy operation for bone or soft tissues sarcoma. Better survival was reported with fewer metastases and longer intervals between diagnosis and the appearance of metastases. In the Thames Cancer Registry for 1985-1994 and 1995 to 2004 five year survival rates for all patients with metastatic sarcoma were 20% and 25% for bone, and for soft tissue sarcoma 13% and 15%.

## Conclusions:

The 5 year survival rate amongst patients who have pulmonary metastasectomy is higher than that observed among unselected registry data for patients with any metastatic disease at diagnosis. There is no evidence that survival difference is attributable to metastasectomy. No data were found on respiratory or any other symptomatic benefit. Given the certain harm associated with thoracotomy, often repeated, better evidence is required.

## Article summary

### Article focus

- Sarcoma metastases are characteristically blood borne and predominately in the lungs.
- Lung metastases are readily imaged and can be removed, while sparing lung parenchyma, often with minimally invasive techniques.
- Pulmonary metastasectomy for bone and soft tissue sarcoma entered clinical practice about forty years and have become established as a standard of care.

### Key messages

- A systematic review of the literature discovered no randomised trial or any other formal attempt to compare survival following pulmonary metastasectomy with what might have been the outcome in similar patients without this surgery.
- There is no evidence in the literature of palliative benefit from pulmonary metastasectomy.
- Detrimental effects on breathing place a limit on repeated and extensive metastasectomy but no beneficial effects are documented.

### Strengths and limitations of this study

- The studies retrieved and systematically reviewed are believed by specialists in sarcoma care to be representative of clinical practice and their experience with management of metastatic sarcoma.
- The data retrieved from clinical follow up studies and the cancer registry are so different with respect to which patients are included, and the data elements available for analysis, that any comparisons are tenuous.

## Introduction

Pulmonary metastasectomy is a well established component in the management of sarcoma. Metastases may be confined to the lung where, surrounded by air containing lung, they are readily detected on radiographs and are usually surgically accessible. The Cooperative Osteosarcoma Study Group (COSS) found that, of 202 patients who had metastases at diagnosis, 81% had lung metastases and 62% only lung metastases.[1] In an analysis of three European Osteosarcoma Intergroup (EOI) randomised controlled trials of chemotherapy, of 564 patients who had recurrence, 307 (54%) had metastases only in the lung.[2] Osteosarcoma particularly affects the young, who are better able to withstand surgery and, if they can be cured by eradicating the disease, or their survival is substantially lengthened, there are potentially many years of life expectancy to be restored.

The decision to perform pulmonary metastasectomy is usually now made by specialist sarcoma teams and is based on factors such as the interval since surgery, the number and rate of growth of metastases, and their response to chemotherapy. The surgical approach may be videothoracoscopic or by thoracotomy, and surgery may be through staged lateral

1  
2  
3 thoractomies or bilateral through an anterior approach. The pulmonary resections are  
4 also “individualised” depending on the location, size and number of metastases, with an  
5 implicit commitment to spare as much lung parenchyma as possible. It may be this  
6 degree of variability which makes data tabulation difficult. The authors of the 2011 EOI  
7 analysis acknowledged that “Amongst the limitations is the limited information on how  
8 the recurrences were treated. However, all patients were treated in experienced sarcoma  
9 centres and it is likely that all patients received the best available treatment for their  
10 recurrence. This includes, whenever possible, complete resection of a local recurrence  
11 and/or surgical treatment of all distant recurrences in case of resectable disease.”[2]  
12  
13  
14

15 In 2006 the UK National Institute of Health and Clinical Excellence (NICE) which issues  
16 guidance to the National Health Service in England and Wales, published a manual for  
17 commissioners of cancer service on “Improving Outcomes for People with Sarcoma”. [3]  
18 The manual is more about organization than practice and states that “The management of  
19 chest wall, intrathoracic sarcomas and pulmonary metastases requires a combination of  
20 skills available from a sarcoma MDT and a thoracic surgeon, often combined with plastic  
21 surgical reconstructive skills”. Included in this guidance is advice on surveillance for the  
22 appearance of pulmonary metastases and states in that context “None of the 21 patients  
23 who presented between follow-up visits with symptomatic pulmonary metastases were  
24 considered candidates for potentially curative surgical resection of their metastases.  
25 Resection of pulmonary metastases was performed for 24 of the 36 patients whose  
26 asymptomatic recurrence was discovered by surveillance chest X-ray or staging CT  
27 scan”[3] based on evidence reviewed.[4,5] There is evident readiness to operate on  
28 asymptomatic pulmonary metastases in sarcoma patients but evidence for the practice, or  
29 guidance which patients are believed to benefit, cannot be inferred from this practice  
30 manual.  
31  
32  
33  
34

35 Thoracic surgeons are increasingly being asked to remove lung metastases as part of the  
36 overall management for a wide range of cancers. In a survey conducted by the European  
37 Society of Thoracic Surgeons (ESTS)[6] practice varied considerably. In particular there  
38 was a wide range of opinions on the weight to be placed on factors known to be  
39 associated with survival such as the time elapsed since diagnosis of the primary tumour  
40 and the number of metastases seen on imaging. This survey was part of a wider  
41 programme of work called The European Society of Thoracic Surgeons Lung  
42 Metastasectomy Project.[7] In the introduction to the published report the leaders of the  
43 project concluded “the level of evidence to support current practice is too low to set firm  
44 recommendations to the members of ESTS.” At the time of writing up The European  
45 Society of Thoracic Surgeons Lung Metastasectomy Project an up to date review of  
46 metastasectomy for sarcoma was not available and the report went to press without it.  
47 We have therefore undertaken a literature search and a systematic review of pulmonary  
48 metastasectomy for sarcoma.  
49  
50  
51  
52

### 53 **Material and methods**

54  
55 Eligibility criteria.  
56  
57  
58  
59  
60

1  
2  
3 A literature search was conducted according to PRISMA 2009 recommendations. [8,9]  
4 We considered eligible all the articles in the English language, from 1950 to the first  
5 week of June 2011, which contained at least 20 patients and any data on surgical  
6 outcome(s). Reviews and teaching articles which contributed no data for analysis were  
7 excluded. Thames Cancer Registry data were extracted for all cases of bone and soft  
8 tissue sarcoma registered from 1985 to 2008.  
9

#### 10 11 Types of participant

12 All patients of any age undergoing pulmonary metastasectomy from any type of sarcoma  
13 (bone, soft and mixed series) regardless of first time or repeated.  
14

#### 15 16 Type of intervention

17 First time or repeated metastasectomy from sarcoma.  
18

#### 19 20 Information sources.

21 A Medline search was conducted using OVIDSP interface. Medline web interface at  
22 www.pubmed.gov was also searched. The Thames Cancer Registry data was used as  
23 comparator.  
24

#### 25 26 Electronic Search.

27 The search expression used was: [lung.mp] AND [metastasectomy.mp] and  
28 [sarcoma.mp].  
29

#### 30 31 Study selection.

32 One author (MS) evaluated the reports quality from titles and abstracts identified from  
33 the electronic database searches according to the pre-defined eligibility criteria. Full text  
34 articles of studies of potentially relevant studies that met the inclusion criteria were  
35 retrieved to assess definite eligibility for inclusion.  
36

#### 37 38 Data collection process.

39 The data was extracted by 2 of the authors (MS, FF) independently and then checked by  
40 another author (TT).  
41

#### 42 43 Data items.

44 The selected papers were searched and, where available, data were extracted with respect  
45 to:

- 46 • Research methodology employed
- 47 • The purpose of the study
- 48 • The patient population from which pulmonary metastasectomy patients were  
49 drawn
- 50 • Inclusion and exclusion criteria
- 51 • Demographic data on patients selected and reported
- 52 • The interval between primary surgery and diagnosis and pulmonary  
53 metastasectomy
- 54 • Chemotherapy use
- 55 • Surgical approach, whether open or videothoracoscopic
- 56
- 57
- 58
- 59
- 60



- Surgical techniques employed
- Survival data
- Statistical analyses of factors related to outcome
- Consideration of second and subsequent metastasectomy operations
- Symptoms and respiratory performance

Thames Cancer Registry data were extracted for stage, data on interventions, sex ratio, median age and survival.

## Results

The search returned 98 articles. In addition the reference lists of all papers were searched. We retrieved a further 17 articles, to make the total up to 115 having excluded duplicate records by title, authors or DOIs. Sixty five articles were excluded by title and/or abstract according to the specified criteria. The full text of the remaining 50 articles was retrieved. A further 32 were further excluded because they did not meet the initial criteria after full text review or duplicated data.

We retained 18 articles published since 1990 for inclusion in the systematic review: five report on first and subsequent pulmonary metastasectomy for bone sarcoma, [10-14] six on soft tissue sarcoma, [15-20] and four on mixed sarcoma series.[21-24] The information in Tables 1, 2, 4, and 6 are extracted from these 15 studies which include data on the patients' first pulmonary metastasectomy. Three of the 18 are confined to repeat pulmonary metastasectomy.[25-27] One of these[27] contained 14 patients rather than the specified minimum of 20 patients but is a further report providing outcomes for repeat metastasectomy of some of the patients reported from the same institution and was therefore included.[13]

With respect to research methodology, there were no randomised controlled trials. There was one comparison study in which patients who had undergone videothoracoscopic resection were matched with patients who had undergone a thoracotomy approach.[24] There were no protocol based prospective studies. There was one retrospective cohort study of data obtained from a Cancer Centre's institutional Tumor Registry.[11] In other reports, cases were identified from databases which were held, as far as we could determine, at an institutional level[10,12-17,20,23,26,27] or departmental level. [18,19,21,24,25] It appears that many of the clinical data were retrieved by retrospective case note review. A statement in a report from the M D Anderson Cancer Centre (MDACC) is probably representative of the approach to data collection: "A prospective surgical database was used to identify metastasectomy patients and missing clinical data were supplemented in a retrospective manner."[23]

In most studies the stated purpose of analysis was to report survival following first [10-21,23,24] or repeated pulmonary metastasectomy.[22,25-27] In ten of the 18 reports, statistical analyses were performed to identify patient and tumour characteristics associated with improved survival following first pulmonary metastasectomy. [11,13,14,16,18,19,21,23,25,26]

1  
2  
3  
4  
5  
6  
7  
8  
9  
10  
11  
12  
13  
14  
15  
16  
17  
18  
19  
20  
21  
22  
23  
24  
25  
26  
27  
28  
29  
30  
31  
32  
33  
34  
35  
36  
37  
38  
39  
40  
41  
42  
43  
44  
45  
46  
47  
48  
49  
50  
51  
52  
53  
54  
55  
56  
57  
58  
59  
60

The population from which the patients having pulmonary metastases were drawn, is given in seven publications.[10-12,14,15,17,23] (Table 1) As can be seen from the footnotes to the table, no two denominators are defined in the same way and none are comprehensive at a community level. Some authors give an upper age limit (not more than 55 years,[12] 40 years,[14] or 20 years[11]) but read in context this appears to be to match the data set of operated patients rather than a prior policy. Some series include all sites while others are limited to limbs[10,12] or trunk and limbs.[11] They variously include all sarcoma patients,[23] or only those with soft tissue sarcoma.[17] The proportion of the denominator population recorded as developing pulmonary metastases ranges between 18% to 50% while the proportion of those with pulmonary metastases who have an operation to remove them varied from 5% to 88%. The report with the largest data set (MDACC) [23]) reported that only 1% of sarcoma patients have a pulmonary metastasectomy. We have not found it possible to determine how much of the variation in the recorded data is attributable to varying selection in clinical practice, the different biology of tumours according to histology, tumour site, or variation amongst patients. A large amount of the variation appears to depend on how wide the net is cast in capturing the denominator.

Amongst these 18 studies of pulmonary metastasectomy for sarcoma the inclusion criteria are much as those proposed by Thomford [28] that the cancer at the primary site was eradicated, controlled, or amenable to control;[10,12,13,15,17-22,24,26,27] that the metastatic lung disease was amenable to complete resection;[10,11,13,15,18-21,24,26,27] that there was no metastatic disease elsewhere;[10,12,13,15,17-22,24,26,27] and that the patient was expected to withstand the loss of lung tissue necessary to give clearance.[10-12,15,17-22,24,26,27] In individual instances authors specified that there should be no mediastinal or chest wall involvement;[17] absence of pericardial or pleural effusions;[12] that the overall operative risk was acceptable;[26] or that there was no other available more effective treatment.[19] In one report, increased size on chemotherapy was allowable, but not an increase in the number of metastases.[24] One study with five subgroups gave group by group criteria which, read in context, appeared to defined after exploration of the available data to facilitate analysis and reporting.[23] Criteria for inclusion or exclusion in the metastasectomy cohort were not found in three studies.[14,16,25]

Data are given in Table 2 for the 15 studies which include data on the first pulmonary metastasectomy, for a total of 1168 patients. The average age of bone sarcoma patients was 17 years based on 377 patients in four studies with calculable data [10,12,13], excluding the reports limited to patients aged <21 years[11] or <40 years.[14] For soft tissue sarcoma the average age was 46 based on five studies including 277 patients[16-20] excluding a study where median and range were given.[15]

Male sex was predominant in bone sarcoma (65% of 532 patients) but not in soft tissue sarcoma reports (50% of 277 patients). These differences in age and sex preclude meaningful amalgamation of outcome data following pulmonary metastasectomy for bone and soft tissue sarcoma.

1  
2  
3  
4  
5  
6  
7  
8  
9  
10  
11  
12  
13  
14  
15  
16  
17  
18  
19  
20  
21  
22  
23  
24  
25  
26  
27  
28  
29  
30  
31  
32  
33  
34  
35  
36  
37  
38  
39  
40  
41  
42  
43  
44  
45  
46  
47  
48  
49  
50  
51  
52  
53  
54  
55  
56  
57  
58  
59  
60

The interval between resection of the primary and first pulmonary metastasectomy was provided in 9/15 reports and was highly variable as can be seen from Table 2. There is a degree of consistency in the median interval of 1-2 years but half of the authors providing data, operated on synchronous metastases (5 of 10). Repeat metastasectomy was performed in 43% of patients based on 14/18 reports in which the data could be extracted. (Table 3)

Chemotherapy was frequently used but schedules were variable both within and between publications. Some authors stated that preoperative and/or post operative chemotherapy was given routinely in all cases[10,21,26,27] but more often the practice varied. [11-14,16,18,21] One paper states “The only constant was that when the disease-free interval was <2 years with a single lung metastasis, no chemotherapy was added to surgery” and another that it was at the discretion of the oncologist.[19] One group used chemotherapy preoperatively only when there were six or more metastases.[17] It was also implicit in the text of several papers that response to chemotherapy was part of the clinical evidence used to help select patients for surgery; non responding and progressing patients were less likely to be selected for pulmonary metastasectomy and this information is not necessarily explicit in the report. This statement in the report from the MDACC is representative of this approach: “Those who developed metastatic disease early with multiple pulmonary nodules were treated initially with chemotherapy to determine the pace of disease progression, if any, on treatment. Patients responding to chemotherapy, those with stable disease, and those with slow progression were referred for resection while those with rapidly progressive metastatic disease received alternative chemotherapy treatment.”[23]

Whether videoscopic or open surgery was used, and if open through what incision, and the surgical technique used to resect the metastases, are summarised in Table 4 for 12/15 papers including data on first metastasectomy operations.[10-13,16-21,24] The remaining three of the 15 studies were not explicit with respect to the surgical approach. In the more common surgery for carcinoma metastasised to the lung, lymphadenectomy has become an important consideration.[29] In these reports concerning sarcoma patients, hilar nodes were not routinely dissected[19] or maybe dissected “when necessary”. [12] This avoidance of lymphatic resection appears to be linked to the lower rate of lymphatic spread in sarcoma compared with other thoracic malignancy in which further spread from the metastases to mediastinal lymph nodes is frequent.[29]

There is a strong evident preference for open surgery (96% of patients had a thoracotomy of some form) with considerable emphasis placed by several authors on the importance of manual palpation of the lung[10-12,16,17,20,22] which cannot be achieved through a purely videoscopic approach. One study specifically addressed the question for whether the less invasive thoracoscopic approach might be as effective[24] and it was concluded that it might be an option if there are no more than two metastases but this was not derived from data analysis presented in the publication. The general use of thoracotomy, often bilateral, and repeated metastasectomy in 43% of patients overall represents a high treatment burden for patients. (Table 3)

1  
2  
3  
4  
5  
6  
7  
8  
9  
10  
11  
12  
13  
14  
15  
16  
17  
18  
19  
20  
21  
22  
23  
24  
25  
26  
27  
28  
29  
30  
31  
32  
33  
34  
35  
36  
37  
38  
39  
40  
41  
42  
43  
44  
45  
46  
47  
48  
49  
50  
51  
52  
53  
54  
55  
56  
57  
58  
59  
60

Thames Cancer Registry data for sarcoma were studied to provide some context to the overall survival rates of patients with sarcoma. (Fig.1) The Registry has employed its own 4-level staging system since 1960 and stages around 60% of all solid tumours. The classification system uses information in the patients' notes to determine if the disease is local (stage 1), has extension beyond the organ of origin (stage 2), has regional lymph node involvement (stage 3) or has metastasised (stage 4). Survival data by stage for two complete decades 1985-1994 and 1995-2004 for both bone and soft tissue sarcoma are provided in Fig.1. For patients entered as Stage 4 bone sarcoma (metastatic disease at the time of registration) in those two decades five year survival of 20% and 25% are recorded for bone sarcoma and 13% and 15% for soft tissue sarcoma.

The Registry does not include full data on treatment but does provide data on the highest surgery code. These are presented in an abbreviated form in Table 5. According to the selection criteria set out above, since the stated first criterion for pulmonary metastasectomy was that a radical operation had been successful at the primary cancer site, it is amongst the 8% of bone sarcoma patients and 21% of soft tissue sarcoma patients that pulmonary metastasectomy patients would be found.

Five year survival data are plotted against publication date (Fig.2) and the size of the series (Fig.3) for 14 of these 15 studies where the data are given, to allow for this visual inspection of time or case volume. Three and/or five years survival for the 15 studies including first (and subsequent) metastasectomy data are plotted in Fig.4

Five year survival data are set out in Table 6 sorted by tumour type from 14 of the 15 studies including first (and subsequent) metastasectomy data. Together these provide data on 1196 patients having metastasectomy from as early as 1976 [16] to as recently as 2008.[14] Overall about a third of patients who have had pulmonary metastasectomy for bone sarcoma and about a quarter who have had pulmonary metastasectomy for STS survive beyond five years. Survival data for two complete decades 1985-1994 and 1995-2004 are included in the table to provide a reference measure of survival in all sarcoma patients in the registry who were classified as Stage 4, that is sarcoma metastasized at presentation/registration. Direct comparison cannot be made but it is a reminder that an implicit assumption that the five year survivals of the patients in the pulmonary metastasectomy series would have approached zero would be incorrect. Summary data of sex distribution and the median age for patients in two completed decades (1985-94 and 1995-2004) with bone and soft tissue sarcoma in Table 7.

We can reasonably deduce

1. that five year survival after pulmonary metastasectomy is not necessarily attributable to the metastasectomy
2. that five year survival does not equate to cure since there are five year survivors with metastatic disease.

1  
2  
3 Data are not available in the publications concerning the fate of patients beyond five  
4 years and there are no narrative accounts of the clinical course of these patients. However  
5 a number of the authors include, in their narrative, a statement of belief in cure for  
6 patients who have recurred in the lung or that their surgery has curative  
7 intent[12,14,16,17,19,24,25] and the phrase “potentially curative resection” is included in  
8 NICE guidance.[3] Illustrative statements from recent publications are these from 2009  
9 and 2010:

10  
11  
12 “Given the lack of effective systemic therapies, PM remains the only potentially curative  
13 treatment for STS lung metastases as long as all known disease can be completely  
14 resected with negative margins.”[16]

15 “We demonstrate that after repeated metastasectomies, a subset of patients can be  
16 cured.”[14]  
17  
18  
19

20 Other author explicitly exclude likelihood of cure attributable to pulmonary  
21 metastasectomy. Antunes writes “The 5-year survival may reach 50%, although true cure  
22 is extremely rare, the majority of patients eventually dying of the disease.”[10] And  
23 Sardenberg and colleagues state “It should be emphasized that surgery does not change  
24 the biology of the tumor or the metastatic process, and a definitive cure  
25 for most patients represents the combination of host histology, tumor spread, response to  
26 systemic therapy, and surgical resection, which together render the patient free of  
27 disease.”[19]  
28  
29

30 Several reports include multivariate analysis to seek factors that might determine a  
31 greater or lesser survival rate. The interval between diagnosis or resection of the primary  
32 cancer and the metastasectomy surgery is the commonest factor reported as being  
33 significant [11,18,19,21,23,25,26] survival usually being better if the interval was 12  
34 months or longer. Fewer metastases was also associated with better survival  
35 [13,14,18,19,23,25,26,30] most commonly at a number of about three or fewer. Female  
36 sex [14,16] was also favourable. Patients in whom there was substantial necrosis  
37 following chemotherapy survived longer.[10,11,14,22]  
38  
39  
40

41 No data were found regarding respiratory function or symptoms in any of the 18 reports.  
42 Where mention was made of respiratory function in the text it was related the decision to  
43 operate. Several authors explained that a point had been, or might be reached, where  
44 respiratory function or respiratory reserve precluded further metastasectomy. No  
45 measurement of this or its consequences for the patients was provided in any report.  
46  
47  
48

## 49 Discussion

50 A major limitation, when interpreting reports of pulmonary metastasectomy for sarcoma,  
51 is the absence of control data. It is usual in surgery to rely heavily on evidence from case  
52 series, either in the form of retrospective case note reviews or less commonly prospective  
53 cohort studies. When there is a clear temporal and mechanistic relationship between  
54 cause and effect, and the signal is evident from the noise, observational studies often  
55 provide sufficient evidence.[31] The simple evidence of cause and affect cannot be  
56  
57  
58  
59  
60

invoked where there is a widely variable time course and multimodal treatments as is the case in protracted, repeated and multimodal treatment of sarcoma.

Efficacy, effectiveness, and cost effectiveness are different measures of the benefits of a treatment. Pulmonary metastasectomy has been shown to be efficacious in that complete macroscopic clearance has been achieved; in appropriately selected cases, R0 resection of all known pulmonary metastases can be consistently accomplished. Whether pulmonary metastasectomy is effective in prolonging life requires proof that survival has been extended, by metastasectomy, beyond that which would have occurred without pulmonary metastasectomy. Cost effectiveness requires, in addition to survival, measures of health gained, measures of health lost due to death and complications, and for these to be costed in comparison with any alternatives, including no treatment. This third measure, estimation of cost effectiveness is outside the scope of this review and depends on first establishing effectiveness.

Evaluation of the effectiveness in preventing or postponing death by pulmonary metastasectomy is the common objective in these clinical reports. The existing practice is believed to be effective based on repeated experience world wide for over forty years. In 1971 thoracic surgeons at Memorial Sloane Kettering reported on 22 patients with treated osteogenic sarcoma in whom they performed lung resections. [32] The meticulous case by case communication of that experience merits revisiting. (Fig.2)

In the discussion that followed Beattie modestly states:

“We reported these data with some reluctance, since they really constitute a progress report on a clinical research project underway at Memorial Hospital. We used osteogenic sarcomas because they are such serious tumors. There are occasional spontaneous regressions and good results; but you saw in the figures Dr. Martini showed that with amputation we have had a 17% five-year cure rate. Of the 83% of patients who died, 5% lived three years. Very occasionally a patient would go on longer before dying.”[32]

Twenty-years later [33] Beattie reported further:

“Twenty-year follow-up reveals that at least four of the six survivors at 10 years survived more than 19 years; one was lost to follow-up. The patient who died of metastatic osteogenic sarcoma more than 19 years after her first thoracotomy had a total of nine thoracotomies.”

An implicit assumption is embedded in many subsequent reports that none of these patients would have lived beyond five years without metastasectomy. There are other reasons, apart from having had pulmonary metastasectomy, for patients with pulmonary metastatic disease to be alive at and beyond five years. These patients are carefully selected and although it is not possible to put a reliable figure on it, they are a minority of all patients with the disease.[2] (Table 1) It is appropriate to select patients for surgery and yet comments such as “survival of (surgically treated) patients was significantly better than of patients ineligible for metastasectomy.  $P < 0.00001$ ”[14] is not an appropriate or meaningful statistical comparison: the difference is evident but how much is due to the selection and how much to the surgery, cannot be determined.

1  
2  
3  
4  
5 The identifiable factors for selection of suitable patients include fewer metastases and a  
6 longer interval between the diagnosis and treatment of the primary and the resection of  
7 pulmonary metastases.[34,35] Others which appear in some analyses are tumour doubling  
8 time and the size of the nodule(s) which under surveillance is a proxy for rate of growth.  
9 These are prognostic features for survival under any circumstance. We also know from  
10 the Thames Cancer Registry data that there are 20-25% of patients with osteosarcoma  
11 and about 15% with soft tissues sarcoma, with metastases at the time of registration, who  
12 are alive beyond five years. (Table 6) The narrative accounts record that there are some  
13 natural long term survivors: “one patient not operated on remains alive 18 years after not  
14 having surgery.”[14] “Long-term survivors appear to belong to a subset of patients with  
15 indolent, lung-only disease.”[36] These natural survivors, who are likely to have slower  
16 progression, and fewer metastases, are likely to be disproportionately frequent amongst  
17 patients selected for metastasectomy [37] as seen in the graphical depiction, for the  
18 selection process is not random. (Fig.6). More than thirty years ago Aberg first proposed  
19 that selection might be the major factor determining survival after pulmonary  
20 metastasectomy [38] and returned to this question in 1997. [39] It is of note that none of  
21 the authors cite Aberg. It is known that “citation distortions create unfounded authority”  
22 [40] and citation network analysis.[41]

23  
24  
25  
26  
27 In fact the effect of selection may easily be underestimated. Multivariable analysis  
28 cannot detect more than a limited number of factors in these relatively small series. All  
29 of these factors may exhibit covariance and they are all indices of the relative  
30 aggressiveness of a cancer. Failure for one or more of these factors to reach significance  
31 in any particular Cox model does not refute the overall finding. Furthermore, if the  
32 knowledge of previous finding leads to the exclusion of some patients, the range of that  
33 variable is reduced and it is less likely to be found in subsequent analyses. [42]

34  
35  
36  
37 In this group of young and therefore physically resilient patients there seems to be a  
38 strong desire to never say no, and to push the boundaries for selection for  
39 metastasectomy. It is well established that patients with more metastases are unlikely to  
40 live long after metastasectomy. Nevertheless there is no apparent upper limit in many of  
41 the reports nor was there for 85% of surgeons in the ESTS survey.[6] Amongst the  
42 reports pulmonary metastasectomy in the present systematic review some surgeons report  
43 very high numbers of metastases resected. For example “The authors have removed as  
44 many as 80 to 100 nodules during a single thoracotomy” [22] and in the COSS report  
45 “The highest number of pulmonary nodules surgically removed was 250”[1] are out of  
46 line with the observational evidence that above a count of relatively few metastases,  
47 outcomes are too poor to justify this surgery. Maybe these high numbers reflect the  
48 observation that the preoperative count of nodules underestimates the true extent of the  
49 disease “It is interesting that despite the presence of only three or four nodules on many  
50 CT scans, up to 50 or more nodules were found and removed in a number of these  
51 patients.”[22] The issue of the relative reliability of modern imaging versus surgeons’  
52 palpation of the lung has been considered elsewhere with varying conclusions.  
53  
54  
55  
56  
57  
58  
59  
60

1  
2  
3 The extent of necrosis caused by chemotherapy evident in the excised nodule was found  
4 to be a favourable feature for survival.[10] The clinical response or failure to respond to  
5 chemotherapy was given as factor in selection in several series. Both of these  
6 observations are evidence that chemotherapy is having an effective in these patients and  
7 has had a demonstrable effect on their disease. Why then should a survival difference be  
8 attributed to the surgery?  
9  
10

11 There is a firm belief that if sarcoma recurs in the lungs, and the patient is still within the  
12 criteria for resection, further resections should be performed. “The authors concluded  
13 that patients persistently free of the primary osteosarcoma who developed recurrent  
14 resectable metastatic disease of the lung should be considered for reoperation a second,  
15 third, or fourth time, as these patients had similar DFI curves after five-years.”[26] This  
16 belief is supported by what might be inappropriate data interpretation. Consider these  
17 statements for example: “Prognostic factors for increased survival included 3 or greater  
18 redo pulmonary operations”[23]; “patients with complete resection for recurrent  
19 pulmonary metastasis show a significantly better prognosis after repeat pulmonary  
20 metastasectomy”[27] and “repeat metastasectomy for recurrent pulmonary metastasis  
21 also provided a favorable overall survival (P <0.041)”.[20] To undergo a second  
22 metastasectomy a patient has to have survived, and been without evidence of disease for  
23 a reasonable length of time, to meet the criteria for each subsequent operation. The  
24 problem is exemplified by Sardenberg and colleagues. Survival was measured from the  
25 first thoracotomy for pulmonary metastasectomy (confirmed with the first author) and  
26 was 15 months, 45 months and 48 months, in 35 patients having only one surgical  
27 episode, 24 who had two and 13 who had three. The authors provide a statistical analysis  
28 (P=0.077) of the association between more thoracotomies and longer survival. They  
29 neglect the fact in their interpretation that survival after surgery, and for a reasonable  
30 period of time, was a requirement to move to the next analytical group.[19] This way of  
31 presenting the data maximizes survivor bias: ongoing survival is an entry criterion to  
32 having a further metastasectomy operation.  
33  
34  
35  
36  
37  
38

39 We found no of data, or even a narrative account, concerning the effect of surgery on  
40 symptoms. The patients who are regarded as candidates for metastasectomy are generally  
41 detected on surveillance and presentation with symptoms probably distinguishes patients  
42 as being not suitable for metastasectomy, either because it represents extrapulmonary  
43 disease of the pulmonary disease is too advanced. The evidence cited in NICE  
44 guidance[3] is as follows: “Detection on the basis of symptoms occurred in 21 patients.  
45 Fifteen of these patients presented between scheduled visits. Seven patients were  
46 symptomatic primarily on the basis of their metastatic pulmonary disease. These patients  
47 had diffuse metastatic disease in all cases, with documented synchronous recurrence  
48 outside the lung, and none was resectable.”[5] What is implicit in many of the reports  
49 reviewed is that ultimately they call a halt to repeated thoractomies because the patient  
50 respiratory function will not withstand further surgery and loss of lung tissue.  
51  
52  
53

54 Two publications[45,46] which appeared in 2011 after completion of our review and data  
55 analysis, and following submission, have been brought to our attention. They come from  
56 prominent North American institutions and appeared in a specialist thoracic surgical  
57  
58  
59  
60



1  
2  
3 journal Annals of Thoracic surgery. The report from Brigham and Women's Hospital,  
4 Boston, Massachusetts states in its title "Repeated and aggressive pulmonary resections  
5 for leiomyoma metastases extends survival". The report is of 82 patients with a variety  
6 of bone and soft tissues sarcomas between 1989-2004. Repeat metastasectomy was  
7 performed in 28/82 with some patients having 3, 4 or 5 thoracic operations. Operated  
8 patients with leiomyosarcoma 31/82 had a median survival of 70 months compared with  
9 24 months for other sarcoma subtypes. No control data for survival amongst comparable  
10 patients not operated upon are provided. The text confirms that the surgery was repeated  
11 and aggressive but that survival was extended as a result cannot be inferred from the data  
12 presented for the reasons given already. The report from Massachusetts General Hospital  
13 is of 97 patients with 13 sarcoma subtypes operated on for pulmonary metastases  
14 between 2002 and 2008.[46] They report that of 69% of 29 patients who had multiple  
15 operations were alive at five years compared with 41% of 60 patients who had a single  
16 operation and find the difference to be statistically significant and the bottom line of the  
17 conclusions reads "Repeated pulmonary metastasectomy in select patients may improve  
18 survival despite recurrent disease." But patients have first to be survivors to be  
19 candidates for surgery, a point the authors make themselves in their discussion "Patients  
20 in whom disease rapidly recurred after surgery (either as a local recurrence or  
21 disseminated disease) were probably selected out from repeated surgical resection." [46]  
22 Neither of these papers provides evidence on symptomatic benefit for these patients.  
23  
24  
25  
26  
27

28 While there are some long term survivors amongst those who have this surgery the  
29 absence of control data leaves Aberg's challenge[38,39] unrefuted. His hypothesis was  
30 that patients destined to survive longer are more likely to be selected for surgery and it is  
31 the process of selection, rather than the effect of pulmonary metastasectomy, that is  
32 responsible for any survival difference perceived. Although it would be challenging to  
33 perform, a randomised controlled trial may be necessary if we are to see the signal from  
34 the noise in this area of clinical practice.  
35  
36  
37  
38  
39  
40  
41  
42  
43  
44  
45  
46  
47  
48  
49  
50  
51  
52  
53  
54  
55  
56  
57  
58  
59  
60

1  
2  
3  
4  
5  
6  
7  
8  
9  
10  
11  
12  
13  
14  
15  
16  
17  
18  
19  
20  
21  
22  
23  
24  
25  
26  
27  
28  
29  
30  
31  
32  
33  
34  
35  
36  
37  
38  
39  
40  
41  
42  
43  
44  
45  
46  
47  
48  
49  
50  
51  
52  
53  
54  
55  
56  
57  
58  
59  
60

## Legends to figures

### Figure 1

Thames Cancer Registry data. Kaplan Meier survival plots by stage for decades 1985-1994 (above) and 1995-2004 (below) for bone (left) and soft tissue sarcoma (right). Stage 4 (that is metastasised at the time of diagnosis/registration) in red.

### Figures 2

Five year survival rates plotted against the publication date.

### Figure 3

Five year survival rates plotted against the size of the series.

### Figure 4

Three and five year survival rates from publications in Table 6. (Bone sarcoma red, soft tissue sarcoma green and mixed series blue.)

### Figure 5

The full display of essential features of the patients and their with survival from primary resection to metastasectomy and subsequently. From Martini et al 1971

### Figure 6

A conservative estimate of natural five year survivors is set at 5% (15/300 in this depiction) and they are in green. Ranking patients on the Y and X axes from least to most favourable based on fewer metastases and longer interval since diagnosis might have the effect of clustering these natural survivors as shown. If selection for surgery is also based on these factors, it might be the selection rather than the surgery which is associated with a higher than anticipated survival rate shown here as 10/25 or 40%.

## Reference List

- 1  
2  
3  
4  
5  
6  
7 (1) Kager L, Zoubek A, Potechger U, *et al.* Primary metastatic osteosarcoma:  
8  
9 presentation and outcome of patients treated on neoadjuvant Cooperative  
10 Osteosarcoma Study Group protocols. *J Clin Oncol.* 2003;21:2011-2018.  
11  
12  
13  
14  
15  
16 (2) Gelderblom H, Jinks RC, Sydes M, *et al.* Survival after recurrent osteosarcoma:  
17 data from 3 European Osteosarcoma Intergroup (EOI) randomized  
18 controlled trials. *Eur J Cancer.* 2011;47:895-902.  
19  
20  
21  
22  
23  
24  
25 (3) National Institute for Health and Clinical Excellence (NICE). Guidance on  
26 Cancer Services. Improving Outcomes for People with Sarcoma. The Manual.  
27 The National Institute for Health and Clinical Excellence (NICE) . 2006.  
28  
29 Ref Type: Electronic Citation  
30  
31  
32  
33  
34  
35  
36  
37 (4) National Institute of Health and Clinical Excellence (NICE). Guidance on  
38 Cancer Services. Improving Outcomes for People with Sarcoma. The Evidence  
39 Review. Institute of Health and Clinical Excellence . 2006.  
40  
41 Ref Type: Electronic Citation  
42  
43  
44  
45  
46  
47  
48 (5) Whooley BP, Gibbs JF, Mooney MM, *et al.* Primary extremity sarcoma: what is  
49 the appropriate follow-up? *Ann Surg Oncol.* 2000;7:9-14.  
50  
51  
52  
53  
54  
55  
56  
57  
58  
59  
60

- 1  
2  
3  
4  
5  
6  
7  
8  
9  
10  
11  
12  
13  
14  
15  
16  
17  
18  
19  
20  
21  
22  
23  
24  
25  
26  
27  
28  
29  
30  
31  
32  
33  
34  
35  
36  
37  
38  
39  
40  
41  
42  
43  
44  
45  
46  
47  
48  
49  
50  
51  
52  
53  
54  
55  
56  
57  
58  
59  
60
- (6) Internullo E, Cassivi SD, Van Raemdonck D, *et al.* Pulmonary metastasectomy: a survey of current practice amongst members of the European Society of Thoracic Surgeons. *J Thorac Oncol.* 2008;3:1257-1266.
- (7) Van Raemdonck D, Friedel G. The European Society of Thoracic Surgeons Lung Metastasectomy Project. *J Thorac Oncol.* 2010;5:S127-S129.
- (8) Liberati A, Altman DG, Tetzlaff J, *et al.* The PRISMA statement for reporting systematic reviews and meta-analyses of studies that evaluate healthcare interventions: explanation and elaboration. *BMJ.* 2009;339:b2700.
- (9) Moher D, Liberati A, Tetzlaff J, *et al.* DG. Preferred reporting items for systematic reviews and meta-analyses: the PRISMA statement. *BMJ.* 2009;339:b2535.
- (10) Antunes M, Bernardo J, Salete M, *et al.* Excision of pulmonary metastases of osteogenic sarcoma of the limbs. *Eur J Cardiothorac Surg.* 1999;15:592-596.
- (11) Harting MT, Blakely ML, Jaffe N *et al.* Long-term survival after aggressive resection of pulmonary metastases among children and adolescents with osteosarcoma. *J Pediatr Surg.* 2006;41:194-199.
- (12) Briccoli A, Rocca M, Salone M, *et al.* High grade osteosarcoma of the extremities metastatic to the lung: long-term results in 323 patients treated

1  
2  
3 combining surgery and chemotherapy, 1985-2005. *Surg Oncol.* 2010;19:193-  
4  
5 199.  
6  
7

8  
9  
10 (13) Chen F, Miyahara R, Bando T *et al.* Prognostic factors of pulmonary  
11  
12 metastasectomy for osteosarcomas of the extremities. *Eur J Cardiothorac*  
13  
14 *Surg.* 2008;34:1235-1239.  
15  
16

17  
18  
19 (14) Buddingh EP, Anninga JK, Versteegh MI *et al.* Prognostic factors in pulmonary  
20  
21 metastasized high-grade osteosarcoma. *Pediatr Blood Cancer.* 2010;54:216-  
22  
23 221.  
24  
25

26  
27  
28 (15) Gadd MA, Casper ES, Woodruff JM, *et al.* Development and treatment of  
29  
30 pulmonary metastases in adult patients with extremity soft tissue sarcoma.  
31  
32 *Ann Surg.* 1993;218:705-712.  
33  
34

35  
36  
37 (16) Smith R, Pak Y, Kraybill W, *et al.* Factors associated with actual long-term  
38  
39 survival following soft tissue sarcoma pulmonary metastasectomy. *Eur J Surg*  
40  
41 *Oncol.* 2009;35:356-361.  
42  
43

44  
45  
46 (17) Rehders A, Hosch SB, Scheunemann P, *et al.* Benefit of surgical treatment of  
47  
48 lung metastasis in soft tissue sarcoma. *Arch Surg.* 2007;142:70-75.  
49  
50  
51

- 1  
2  
3  
4  
5  
6  
7  
8  
9  
10  
11  
12  
13  
14  
15  
16  
17  
18  
19  
20  
21  
22  
23  
24  
25  
26  
27  
28  
29  
30  
31  
32  
33  
34  
35  
36  
37  
38  
39  
40  
41  
42  
43  
44  
45  
46  
47  
48  
49  
50  
51  
52  
53  
54  
55  
56  
57  
58  
59  
60
- (18) Garcia Franco CE, Algarra SM, Ezcurra AT *et al.* Long-term results after resection for soft tissue sarcoma pulmonary metastases. *Interact Cardiovasc Thorac Surg.* 2009;9:223-226.
- (19) Sardenberg RA, Figueiredo LP, Haddad FJ, *et al.* Pulmonary metastasectomy from soft tissue sarcomas. *Clinics (Sao Paulo).* 2010;65:871-876.
- (20) Chen F, Fujinaga T, Sato K, *et al.* Significance of tumor recurrence before pulmonary metastasis in pulmonary metastasectomy for soft tissue sarcoma. *Eur J Surg Oncol.* 2009;35:660-665.
- (21) Garcia Franco CE, Torre W, Tamura A, *et al.* Long-term results after resection for bone sarcoma pulmonary metastases. *Eur J Cardiothorac Surg.* 2010;37:1205-1208.
- (22) Snyder C, Saltzman D, Ferrell K, *et al.* A new approach to the resection of pulmonary osteosarcoma metastases. *Results of aggressive metastasectomy. Clinical Orthopaedics and Related Research.* 1991;270:246-253.
- (23) Blackmon SH, Shah N, Roth JA, *et al.* Resection of pulmonary and extrapulmonary sarcomatous metastases is associated with long-term survival. *Ann Thorac Surg.* 2009;88:877-884.

- 1  
2  
3  
4 (24) Gossot D, Radu C, Girard P, *et al.* Resection of pulmonary metastases from  
5 sarcoma: can some patients benefit from a less invasive approach? *Ann*  
6 *Thorac Surg.* 2009;87:238-243.  
7  
8  
9  
10  
11  
12 (25) Casson AG, Putnam JB, Natarajan G, *et al.* Efficacy of pulmonary  
13 metastasectomy for recurrent soft tissue sarcoma. *J Surg Oncol.* 1991;47:1-4.  
14  
15  
16  
17  
18  
19 (26) Briccoli A, Rocca M, Salone M, *et al.* Resection of recurrent pulmonary  
20 metastases in patients with osteosarcoma. *Cancer.* 2005;104:1721-1725.  
21  
22  
23  
24  
25  
26 (27) Chen F, Miyahara R, Bando T, *et al.* Repeat resection of pulmonary metastasis  
27 is beneficial for patients with osteosarcoma of the extremities. *Interact*  
28 *Cardiovasc Thorac Surg.* 2009;9:649-653.  
29  
30  
31  
32  
33  
34  
35  
36 (28) Thomford NR, Woolner L, Clagett O. The surgical treatment of metastatic  
37 tumours in the lung. *J Thorac Cardiovasc Surg.* 1965;49:357-363.  
38  
39  
40  
41  
42 (29) Garcia-Yuste M, Cassivi S, Paleru C. Thoracic lymphatic involvement in  
43 patients having pulmonary metastasectomy: incidence and the effect on  
44 prognosis. *J Thorac Oncol.* 2010;5:S166-S169.  
45  
46  
47  
48  
49  
50  
51  
52 (30) Casson AG, Putnam JB, Natarajan G, *et al.* Five-year survival after pulmonary  
53 metastasectomy for adult soft tissue sarcoma. *Cancer.* 1992;69:662-668.  
54  
55  
56  
57  
58  
59  
60

- 1  
2  
3  
4  
5  
6  
7  
8  
9  
10  
11  
12  
13  
14  
15  
16  
17  
18  
19  
20  
21  
22  
23  
24  
25  
26  
27  
28  
29  
30  
31  
32  
33  
34  
35  
36  
37  
38  
39  
40  
41  
42  
43  
44  
45  
46  
47  
48  
49  
50  
51  
52  
53  
54  
55  
56  
57  
58  
59  
60
- (31) Glasziou P, Chalmers I, Rawlins M, *et al*. When are randomised trials unnecessary? Picking signal from noise. *BMJ*. 2007;334:349-351.
- (32) Martini N, Huvos AG, Mike V, *et al*. Multiple pulmonary resections in the treatment of osteogenic sarcoma. *Ann Thorac Surg*. 1971;12:271-280.
- (33) Beattie EJ, Harvey JC, Marcove R, *et al*. Results of multiple pulmonary resections for metastatic osteogenic sarcoma after two decades. *J Surg Oncol*. 1991;46:154-155.
- (34) van Geel AN, Pastorino U, Jauch KW, *et al*. Surgical treatment of lung metastases: The European Organization for Research and Treatment of Cancer-Soft Tissue and Bone Sarcoma Group study of 255 patients. *Cancer*. 1996;77:675-682.
- (35) van Geel AN, Rm van Der SJ, Schmitz PI. Which Soft Tissue Sarcoma Patients with Lung Metastases Should not Undergo Pulmonary Resection? *Sarcoma*. 2002;6:57-60.
- (36) Billingsley KG, Burt ME, Jara E, *et al*. Pulmonary metastases from soft tissue sarcoma: analysis of patterns of diseases and postmetastasis survival. *Ann Surg*. 1999;229:602-610.



- 1  
2  
3  
4 (37) Utlely M, Treasure T. Interpreting data from surgical follow-up studies: the  
5 role of modeling. *J Thorac Oncol*. 2010;5:S200-S202.  
6  
7  
8  
9  
10 (38) Aberg T, Malmberg KA, Nilsson B, *et al*. The effect of metastasectomy: fact or  
11 fiction? *Ann Thorac Surg*. 1980;30:378-384.  
12  
13  
14  
15  
16  
17 (39) Aberg T. Selection mechanisms as major determinants of survival after  
18 pulmonary metastasectomy. *Ann Thorac Surg*. 1997;63:611-612.  
19  
20  
21  
22  
23  
24 (40) Greenberg SA. How citation distortions create unfounded authority: analysis  
25 of a citation network. *BMJ*. 2009;339:b2680.  
26  
27  
28  
29  
30  
31 (41) Fiorentino F, Vasilakis C, Treasure T. Clinical reports of pulmonary  
32 metastasectomy for colorectal cancer: a citation network analysis. *Br J*  
33 *Cancer*. 2011;104:1085-1097.  
34  
35  
36  
37  
38  
39  
40 (42) Utlely M, Treasure T. The use of scoring systems in selecting patients for lung  
41 resection: work-up bias comes full-circle. *Thorac Surg Clin*. 2008;18:107-112.  
42  
43  
44  
45  
46  
47 (43) Nakas A, Klimatsidas MN, Entwisle J, *et al*. Video-assisted versus open  
48 pulmonary metastasectomy: the surgeon's finger or the radiologist's eye? *Eur*  
49 *J Cardiothorac Surg*. 2009;36:469-474.  
50  
51  
52  
53  
54  
55  
56  
57  
58  
59  
60

- 1  
2  
3  
4 (44) Detterbeck FC, Grodzki T, Gleeson F, *et al.* Imaging requirements in the  
5  
6 practice of pulmonary metastasectomy. *J Thorac Oncol.* 2010;5:S134-S139.  
7  
8  
9  
10 (45) Burt BM, Ocejo S, Mery CM, *et al.* Repeated and aggressive pulmonary  
11  
12 resections for leiomyosarcoma metastases extends survival. *Ann Thorac Surg*  
13  
14 2011; 92:1202-1207  
15  
16  
17  
18  
19 (46) Kim S, Ott HC, Wright CD, *et al.* Pulmonary resection of metastatic sarcoma:  
20  
21 prognostic factors associated with improved outcomes. *Ann Thorac Surg*  
22  
23 2011; 92(5):1780-1786  
24  
25  
26  
27  
28  
29  
30  
31  
32  
33  
34  
35  
36  
37  
38  
39  
40  
41  
42  
43  
44  
45  
46  
47  
48  
49  
50  
51  
52  
53  
54  
55  
56  
57  
58  
59  
60

1  
2  
3  
4  
5  
6  
7  
8  
9  
10  
11  
12  
13  
14  
15  
16  
17  
18  
19  
20  
21  
22  
23  
24  
25  
26  
27  
28  
29  
30  
31  
32  
33  
34  
35  
36  
37  
38  
39  
40  
41  
42  
43  
44  
45  
46  
47  
48  
49  
50  
51  
52  
53  
54  
55  
56  
57  
58  
59  
60

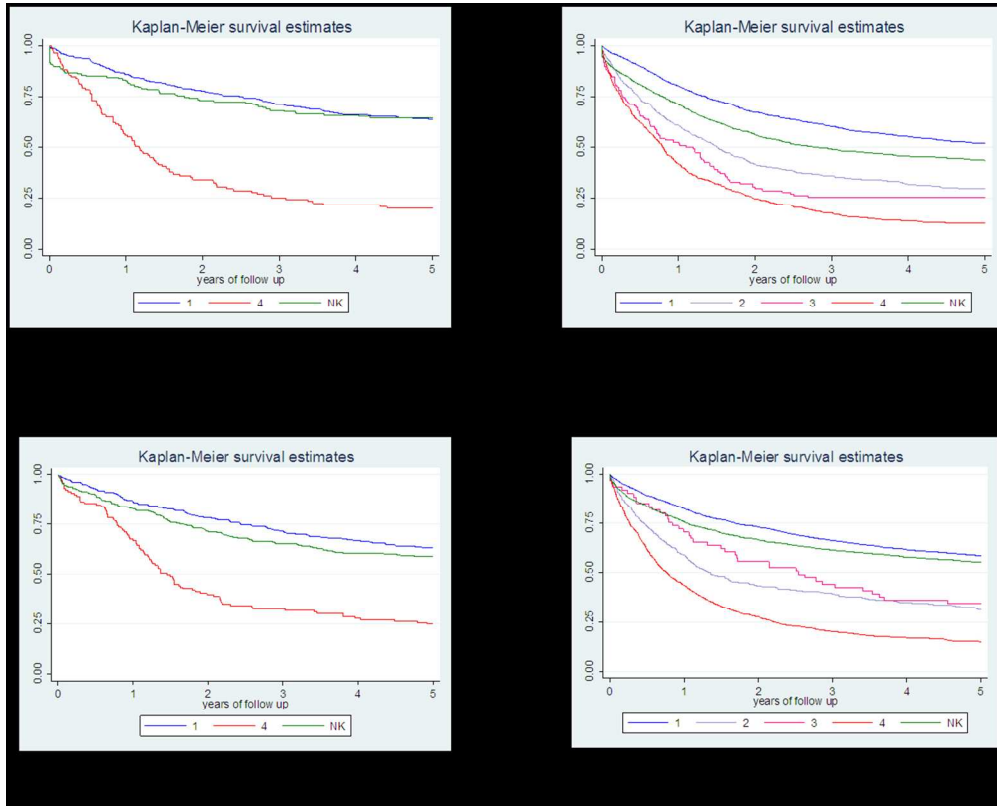

Figure 1  
Thames Cancer Registry data. Kaplan Meier survival plots by stage for decades 1985-1994 (above) and 1995-2004 (below) for bone (left) and soft tissue sarcoma (right). Stage 4 (that is metastasised at the time of diagnosis/registration) in red.

214x172mm (150 x 150 DPI)

only

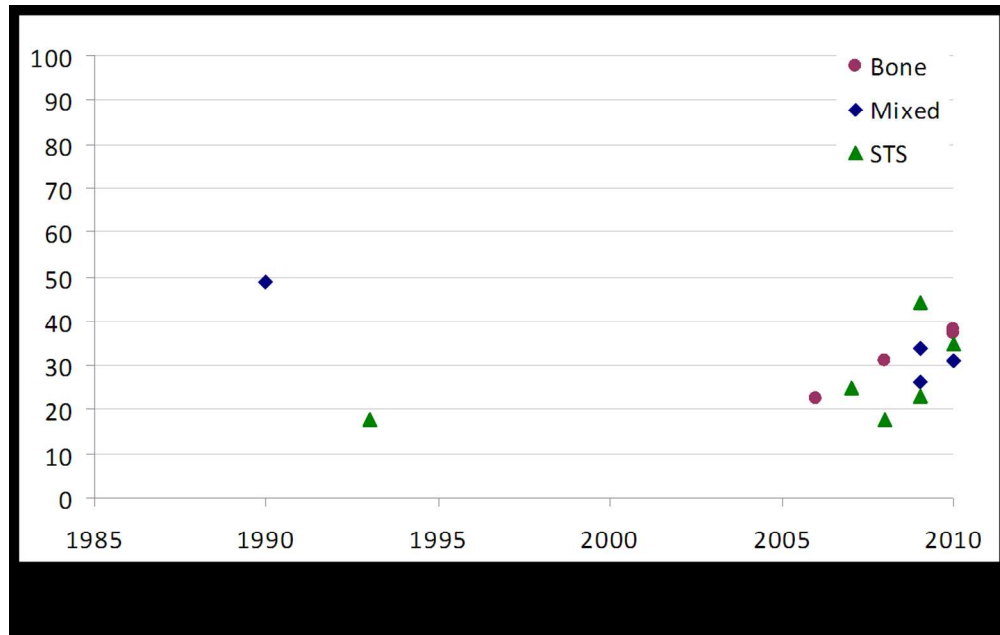

Figures 2  
Five year survival rates plotted against the publication date.

228x144mm (150 x 150 DPI)

1  
2  
3  
4  
5  
6  
7  
8  
9  
10  
11  
12  
13  
14  
15  
16  
17  
18  
19  
20  
21  
22  
23  
24  
25  
26  
27  
28  
29  
30  
31  
32  
33  
34  
35  
36  
37  
38  
39  
40  
41  
42  
43  
44  
45  
46  
47  
48  
49  
50  
51  
52  
53  
54  
55  
56  
57  
58  
59  
60



Figure 3  
Five year survival rates plotted against the size of the series.

224x144mm (150 x 150 DPI)

View only

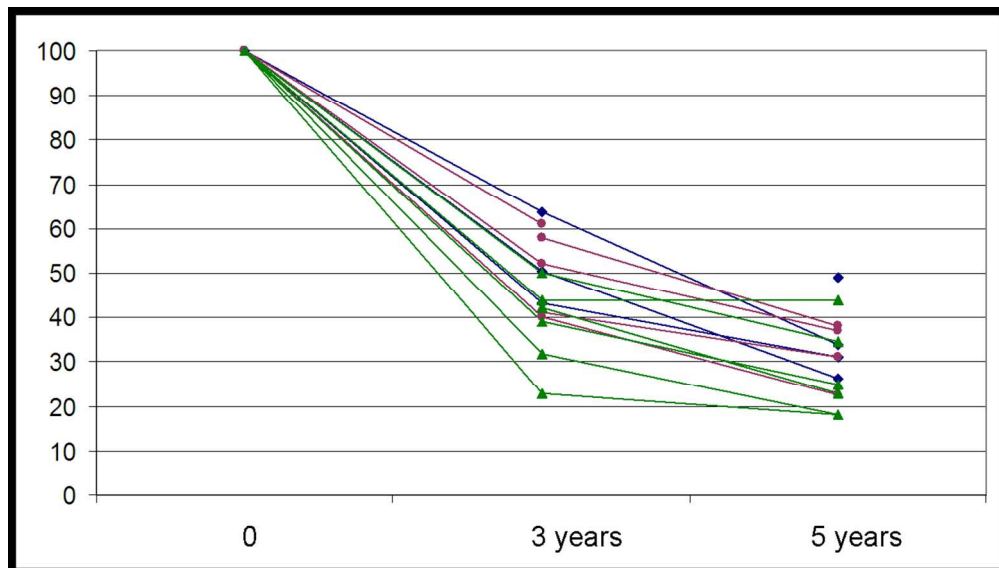

Figure 4  
 Three and five year survival rates from publications in Table 6. (Bone sarcoma red, soft tissue sarcoma green and mixed series blue.)

226x127mm (150 x 150 DPI)

Review only

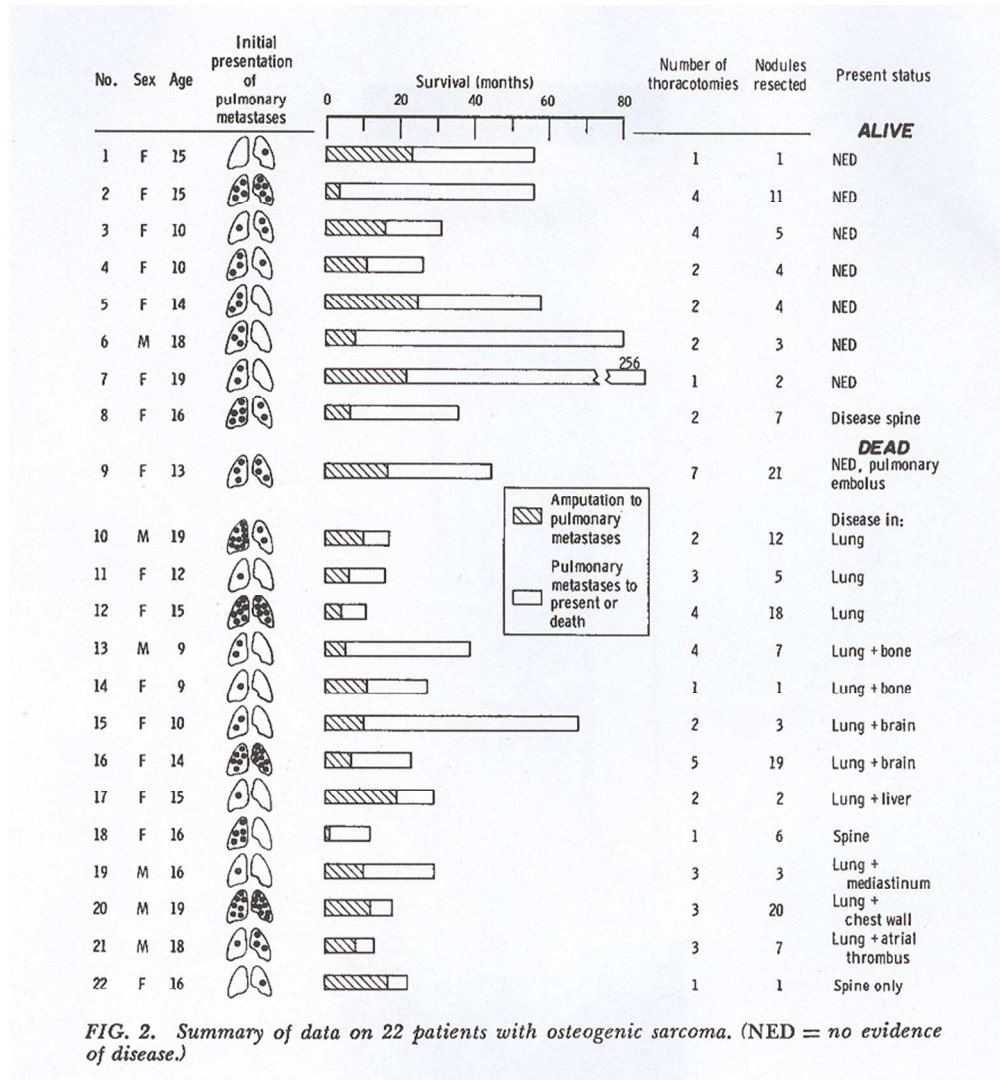

Figure 5

The full display of essential features of the patients and their with survival from primary resection to metastasectomy and subsequently. From Martini et al 1971

150x161mm (150 x 150 DPI)

1  
2  
3  
4  
5  
6  
7  
8  
9  
10  
11  
12  
13  
14  
15  
16  
17  
18  
19  
20  
21  
22  
23  
24  
25  
26  
27  
28  
29  
30  
31  
32  
33  
34  
35  
36  
37  
38  
39  
40  
41  
42  
43  
44  
45  
46  
47  
48  
49  
50  
51  
52  
53  
54  
55  
56  
57  
58  
59  
60

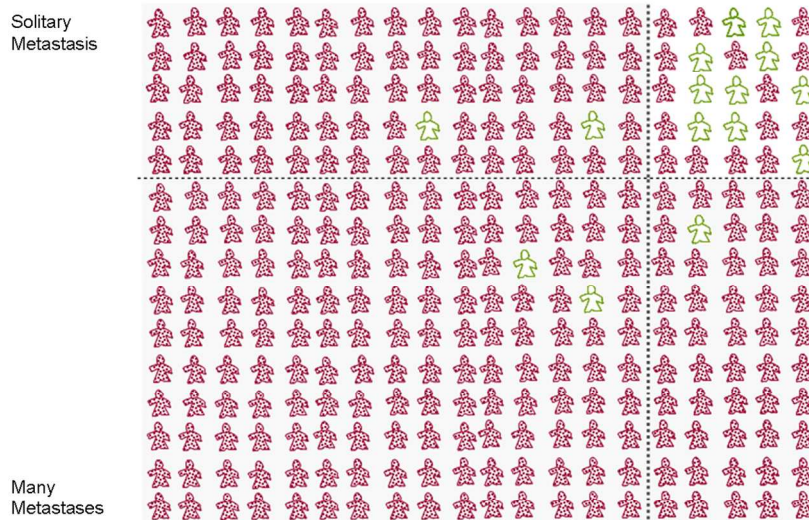

Increasing interval between 1o diagnosis and appearance of pulmonary metastases

Figure 6

A conservative estimate of natural five year survivors is set at 5% (15/300 in this depiction) and they are in green. Ranking patients on the Y and X axes from least to most favourable based on fewer metastases and longer interval since diagnosis might have the effect of clustering these natural survivors as shown. If selection for surgery is also based on these factors, it might be the selection rather than the surgery which is associated with a higher than anticipated survival rate shown here as 10/25 or 40%.

235x176mm (150 x 150 DPI)

only



| Publication   | Histo | Start Date | End Date | All registered sarcoma patients<br>A | Patients with pulmonary metastases<br>B | Pulmonary Metastases as reported in cited papers in systematic review<br>C | Proportion of sarcoma patients with pulmonary metastases<br>(=B/A) | Proportion of Patients with pulmonary metastases who have metastasectomy (data as in reports)<br>(=C/B) | Proportion of all sarcoma patients who have pulmonary metastectomy<br>(=C/A) |
|---------------|-------|------------|----------|--------------------------------------|-----------------------------------------|----------------------------------------------------------------------------|--------------------------------------------------------------------|---------------------------------------------------------------------------------------------------------|------------------------------------------------------------------------------|
| Antunes 1999  | Bone  | 1989       | 1997     | 198 <sup>a</sup>                     |                                         | 31                                                                         |                                                                    |                                                                                                         | 16%                                                                          |
| Harting 2006  | Bone  | 1980       | 2000     | 272 <sup>b</sup>                     | 137 <sup>c</sup>                        | 99                                                                         | 50%                                                                | 72%                                                                                                     | 36%                                                                          |
| Briccoli 2010 | Bone  | 1985       | 2005     | 1197 <sup>d</sup>                    | 369 <sup>e</sup>                        | 323                                                                        | 31%                                                                | 88%                                                                                                     | 27%                                                                          |
| Buddingh 2009 | Bone  | 1990       | 2008     | 197 <sup>f</sup>                     | 88 <sup>g</sup>                         | 56                                                                         | 45%                                                                | 64%                                                                                                     | 28%                                                                          |
| Gadd 1993     | STS   | 1983       | 1990     | 716 <sup>h</sup>                     | 135 <sup>i</sup>                        | 78                                                                         | 19%                                                                | 58%                                                                                                     | 11%                                                                          |
| Rehders 2007  | STS   | 1991       | 2002     | 678 <sup>j</sup>                     | 121 <sup>k</sup>                        | 61                                                                         | 18%                                                                | 50%                                                                                                     | 9%                                                                           |
| Blackmon 2009 | Mixed | 1998       | 2006     | 15744 <sup>l</sup>                   | 4355 <sup>m</sup>                       | 234                                                                        | 28%                                                                | 5%                                                                                                      | 1%                                                                           |

Table 1 Data from reports providing the number of patients from which the study population was derived

<sup>a</sup>patients operated on for osteogenic sarcomas of the limbs were followed in their centre

<sup>b</sup>patients with osteosarcoma of the trunk or extremities who were younger than 21 years and who had medical records available for review

<sup>c</sup>developed or presented with radiographically evident pulmonary nodules. These 137 patients formed the initial study cohort.

<sup>d</sup>patients with histologically proven HGOS of the extremity 55 years old or younger diagnosed at their Institution

<sup>e</sup>first recurrence with metastases located only in the lung

<sup>f</sup>patients under the age of 40 treated for high-grade OS at the Leiden University Medical Center

<sup>g</sup>patients who had pulmonary metastases either at diagnosis or during follow-up

<sup>h</sup>adult patients with a primary or locally recurrent extremity soft tissue sarcoma admitted to MSKCC

<sup>i</sup>patients with pulmonary metastases

<sup>j</sup>patients with STS were treated at the Department of Surgery, University Hospital

<sup>k</sup>pulmonary metastasis of STS occurred during follow-up,

<sup>l</sup>patients with soft tissue and bone sarcoma referred to The University of Texas M.D. Anderson Cancer Center

<sup>m</sup>patients diagnosed with sarcomatous pulmonary metastases

| Author             | Sarcoma patients who have pulmonary metastasectomy (N) | Age mean (years) | Age range (years) | Sex Males | Sex %male | Median interval between primary and metastases (months) | Range (months) | Mean number of mets resected | Range |
|--------------------|--------------------------------------------------------|------------------|-------------------|-----------|-----------|---------------------------------------------------------|----------------|------------------------------|-------|
| Bone               |                                                        |                  |                   |           |           |                                                         |                |                              |       |
| Antunes 1999       | 31                                                     | 25               | 10-54             | 21        | 68%       | 22                                                      | 4-122          | 3.2                          | 1-8   |
| Harting 2006       | 99                                                     | 13.9             | +/- 4.2           | 67        | 68%       | 0 in 17%                                                | 0-NF           |                              | 1->10 |
| Briccoli 2010      | 323                                                    | 16               | 4-55              | 201       | 62%       | NF                                                      |                | NF                           | NF    |
| Chen 2008          | 23                                                     | 19               | 6-68              | 15        | 65%       | 19                                                      | 0-108          | 5.0                          |       |
| Buddingh 2010      | 56                                                     | NF               | NF                | 40        | 71%       | NF                                                      |                |                              |       |
| Soft Tissue        |                                                        |                  |                   |           |           |                                                         |                |                              |       |
| Gadd 1993          | 78                                                     | (55)*            | 17-85             | NF        |           | 14                                                      | 1-152          | NF                           | NF    |
| Smith 2009         | 94                                                     | 49               | 9-75              | 47        | 50%       | 15                                                      | 0-NF           | 2.5                          | 1-105 |
| Rehders 2007       | 61                                                     | 42               | 18-47             | 33        | 54%       | 21                                                      | 0-3            | 5.0                          | 1-48  |
| Garcia Franco 2009 | 22                                                     | 41               | 13-82             | 10        | 45%       | 18                                                      | 5-84           |                              |       |
| Sardenberg 2010    | 77                                                     | 45               | NF                | 37        | 48%       | NF                                                      |                | 3.5                          |       |
| Chen 2009          | 23                                                     | 53               | 15-86             | 12        | 52%       | NF                                                      | 0-168          |                              |       |
| Mixed              |                                                        |                  |                   |           |           |                                                         |                |                              |       |
| Snyder 1991        | 34                                                     | 23               | NF                | 20        | 59%       | 19                                                      | <6->24         | 11                           | NF    |
| Blackmon 2009      | 234                                                    | <50*             |                   | 123       | 53%       | Varied                                                  | NF             | NF                           | NF    |
| Gossot 2009        | 60                                                     | 40               |                   | 34        | 57%       | 18                                                      | NF             | NF                           | NF    |
| Garcia franco 2010 | 52                                                     | 20               | 5-74              | 31        | 60%       | 20                                                      | 5-189          | NF                           | NF    |

Table 2 Summary data on 15 papers reporting on series of patient undergoing a first pulmonary metastasectomy operation for sarcoma.

\* median age

NF means data were not found

| Series             | N   |       | Multiple |
|--------------------|-----|-------|----------|
|                    | 1st | N 2nd |          |
| Rehders 2007       | 61  | 13    | 21%      |
| Antunes 1999       | 31  | 8     | 26%      |
| Garcia franco 2010 | 52  | 16    | 31%      |
| Garcia Franco 2009 | 22  | 7     | 32%      |
| Chen (EJSO) 2009   | 23  | 8     | 35%      |
| Smith 2009         | 94  | 33    | 35%      |
| Briccoli 2005      | 267 | 94    | 35%      |
| Briccoli 2010      | 323 | 122   | 38%      |
| Buddingh 2010      | 56  | 26    | 46%      |
| Sardenberg 2010    | 77  | 37    | 48%      |
| Gossot 2009        | 60  | 33    | 55%      |
| Blackmon 2009      | 234 | 141   | 60%      |
| Chen (EJCTS) 2008  | 23  | 14    | 61%      |
| Snyder 1991        | 34  | 28    | 82%      |

Table 3. The proportion of patients who have second or subsequent metastasectomy. This does not include staged bilateral thoracotomies which are regarded as a single intervention. Reports are ranked according to the proportion having second and subsequent metastasectomy interventions. Sequential staged operations (for example lateral thoracotomies planned with an interval of 1-3 weeks) are considered by the authors as a single episode of treatment.

| Report             | Surgical approach                                                                                           | Surgical technique                                                                                |
|--------------------|-------------------------------------------------------------------------------------------------------------|---------------------------------------------------------------------------------------------------|
| Snyder 1991        | Thoractomy<br>Bilateral disease staged thoracotomy, 1-2 weeks interval 16/34                                | Enucleation                                                                                       |
| Antunes 1999       | Thoracotomy 30/31<br>Median sternotomy 1/31                                                                 | Enucleation<br>Wedge resection<br>Lobectomy                                                       |
| Harting 2006       | Thoracotomy,<br>Staged or simultaneous bilateral thoracotomies<br>Median sternotomy                         |                                                                                                   |
| Briccoli 2010      | Thoracotomy<br>Bilateral thoracotomies                                                                      | Wedge resection<br>Lobectomy<br>Pneumonectomy                                                     |
| Garcia Franco 2010 | Thoracotomy 30/52<br>Sequential bilateral thoracotomy 7/52<br>VATS) 10/52<br>Clamshell 5/52                 | Wedge 44/52<br>Lobectomy 6/52<br>Exploratory thoracotomies 2/52 <sup>i</sup>                      |
| Chen 2008          | Thoracotomy                                                                                                 | Wedge 22/23<br>Lobe 1/23                                                                          |
| Smith 2009         |                                                                                                             | Wedge 74/94<br>Lobectomy 17/94<br>Pneumonectomy 3/94<br>Resection of other thoracic disease 16/94 |
| Rehders 2007       | Thoracotomy 29 (48)<br>Bilateral thoracotomy, 2 sessions 10 (16) <sup>ii</sup><br>Median sternotomy 22 (36) | Wedge resection 52 (85)<br>Lobectomy 9 (15)                                                       |
| Garcia Franco 2009 | Thoracotomy 19<br>VATS 2<br>Sternotomy 1                                                                    | Wedge 19<br>Lobectomy 3                                                                           |
| Sardenberg 2010    | Thoracotomy<br>Staged bilateral thoracotomy                                                                 | Complete resection with 10mm margin                                                               |
| Chen EJSO 2009     |                                                                                                             | Wedge resection 21/23<br>Lobectomy 1/23<br>Pneumonectomy 1/23                                     |
| Gossott 2009       | Thoracotomy 29<br>VATS 31<br>In a comparative study of the two approaches                                   |                                                                                                   |

Table 4 Surgical approaches and resection techniques in reports of 1<sup>st</sup> time pulmonary metastasectomy

<sup>i</sup> That is to say no resection of sarcoma was performed in these patients.

<sup>ii</sup> These patients have planned sequential operations about two weeks apart and it is regarded as a single intervention as opposed to a repeat metastasectomy operation.

1  
2  
3  
4  
5  
6  
7  
8  
9  
10  
11  
12  
13  
14  
15  
16  
17  
18  
19  
20  
21  
22  
23  
24  
25  
26  
27  
28  
29  
30  
31  
32  
33  
34  
35  
36  
37  
38  
39  
40  
41  
42  
43  
44  
45  
46  
47  
48  
49

|                                                           | Bone |      | STS   |      |
|-----------------------------------------------------------|------|------|-------|------|
|                                                           | N    | %    | N     | %    |
| Total removal of organ, or operation stated to be radical | 145  | 8%   | 3203  | 21%  |
| Partial or debulking operations on the primary tumour     | 648  | 35%  | 4935  | 32%  |
| Lymphadenectomy                                           | 2    | 0.1% | 171   | 1%   |
| Non-tumour removing surgical treatment                    | 160  | 9%   | 245   | 2%   |
| Haematological procedure (e.g. bone marrow transplant)    | 2    | 0.1% | 19    | 0.1% |
| Investigative procedure only                              | 298  | 16%  | 2072  | 14%  |
| Type of surgery not known                                 | 11   | 1%   | 59    | 0.4% |
| No surgery recorded                                       | 581  | 31%  | 4559  | 30%  |
|                                                           | 1847 | 100% | 15263 | 100% |

Table 5 Highest Surgery Code of Thames Cancer Registry sarcoma patients 1985-2008

| Author             | Sarcoma patients who have pulmonary metastasectomy (N) | Five year survival where provided | Middle date of metastasectomy series and date ranges for TCR |
|--------------------|--------------------------------------------------------|-----------------------------------|--------------------------------------------------------------|
| <b>Bone</b>        |                                                        |                                   |                                                              |
| Harting 2006       | 93                                                     | 23%                               | 1991                                                         |
| Briccoli 2010      | 323                                                    | 37%                               | 1996                                                         |
| Chen (EJCTS) 2008  | 23                                                     | 31%                               | 1999                                                         |
| Buddingh 2010      | 56                                                     | 38%                               | 2000                                                         |
| TCR                |                                                        | 20%                               | 1985-1994                                                    |
| TCR                |                                                        | 25%                               | 1995-2004                                                    |
| <b>Soft Tissue</b> |                                                        |                                   |                                                              |
| Gadd 1993          | 78                                                     | 18%                               | 1987                                                         |
| Smith 2009         | 94                                                     | 18%                               | 1989                                                         |
| Rehders 2007       | 61                                                     | 25%                               | 1997                                                         |
| Sardenberg 2010    | 77                                                     | 35%                               | 1999                                                         |
| Chen (EJSO) 2009   | 23                                                     | 44%                               | 1999                                                         |
| Garcia Franco 2009 | 22                                                     | 23%                               | 2002                                                         |
| TCR                |                                                        | 13%                               | 1985-1994                                                    |
| TCR                |                                                        | 15%                               | 1995-2004                                                    |
| <b>Mixed</b>       |                                                        |                                   |                                                              |
| Snyder 1991        | 34                                                     | 49%                               | 1984                                                         |
| Garcia franco 2010 | 52                                                     | 31%                               | 2002                                                         |
| Blackmon 2009      | 234                                                    | 26%                               | 2003                                                         |
| Gossot 2009        | 60                                                     | 34%                               | 2004                                                         |

Table 6 Five years survival and Thames Cancer Registry summary data

Five year survival from 14 of the 15 studies reporting first (and subsequent) pulmonary metastasectomy operations. They are grouped by sarcoma type and then by mid year of the series to aid visual inspection for time trends. Thames Cancer Registry (TCR) five year survival data for Stage 4 patients are provided for two complete decades of data overlapping the reported series. These TCR patients all had metastases at presentation but not necessarily lung or lung only.

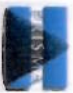

# PRISMA 2009 Checklist

| Section/topic                      | #  | Checklist item                                                                                                                                                                                                                                                                                              | Reported on page # |
|------------------------------------|----|-------------------------------------------------------------------------------------------------------------------------------------------------------------------------------------------------------------------------------------------------------------------------------------------------------------|--------------------|
| <b>TITLE</b>                       |    |                                                                                                                                                                                                                                                                                                             |                    |
| Title                              | 1  | Identify the report as a systematic review, meta-analysis, or both.                                                                                                                                                                                                                                         | 1                  |
| <b>ABSTRACT</b>                    |    |                                                                                                                                                                                                                                                                                                             |                    |
| Structured summary                 | 2  | Provide a structured summary including, as applicable: background; objectives; data sources; study eligibility criteria; participants; and interventions; study appraisal and synthesis methods; results; limitations; conclusions and implications of key findings; systematic review registration number. | 3                  |
| <b>INTRODUCTION</b>                |    |                                                                                                                                                                                                                                                                                                             |                    |
| Rationale                          | 3  | Describe the rationale for the review in the context of what is already known.                                                                                                                                                                                                                              | 4-5                |
| Objectives                         | 4  | Provide an explicit statement of questions being addressed with reference to participants, interventions, comparisons, outcomes, and study design (PICOS).                                                                                                                                                  |                    |
| <b>METHODS</b>                     |    |                                                                                                                                                                                                                                                                                                             |                    |
| Protocol and registration          | 5  | Indicate if a review protocol exists, if and where it can be accessed (e.g., Web address), and, if available, provide registration information including registration number.                                                                                                                               | N/A                |
| Eligibility criteria               | 6  | Specify study characteristics (e.g., PICOS, length of follow-up) and report characteristics (e.g., years considered, language, publication status) used as criteria for eligibility, giving rationale.                                                                                                      | 5                  |
| Information sources                | 7  | Describe all information sources (e.g., databases with dates of coverage, contact with study authors to identify additional studies) in the search and date last searched.                                                                                                                                  | 5                  |
| Search                             | 8  | Present full electronic search strategy for at least one database, including any limits used, such that it could be repeated.                                                                                                                                                                               | 5                  |
| Study selection                    | 9  | State the process for selecting studies (i.e., screening, eligibility, included in systematic review, and, if applicable, included in the meta-analysis).                                                                                                                                                   | 5                  |
| Data collection process            | 10 | Describe method of data extraction from reports (e.g., piloted forms, independently, in duplicate) and any processes for obtaining and confirming data from investigators.                                                                                                                                  | 5-6                |
| Data items                         | 11 | List and define all variables for which data were sought (e.g., PICOS, funding sources) and any assumptions and simplifications made.                                                                                                                                                                       | 5                  |
| Risk of bias in individual studies | 12 | Describe methods used for assessing risk of bias of individual studies (including specification of whether this was done at the study or outcome level), and how this information is to be used in any data synthesis.                                                                                      | N/A                |
| Summary measures                   | 13 | State the principal summary measures (e.g., risk ratio, difference in means).                                                                                                                                                                                                                               | N/A                |
| Synthesis of results               | 14 | Describe the methods of handling data and combining results of studies, if done, including measures of consistency (e.g., $I^2$ ) for each meta-analysis.                                                                                                                                                   | N/A                |

1  
2  
3  
4  
5  
6  
7  
8  
9  
10  
11  
12  
13  
14  
15  
16  
17  
18  
19  
20  
21  
22  
23  
24  
25  
26  
27  
28  
29  
30  
31  
32  
33  
34  
35  
36  
37  
38  
39  
40  
41  
42  
43  
44  
45  
46  
47  
48  
49  
50  
51  
52  
53  
54  
55  
56  
57  
58  
59  
60

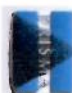

## PRISMA 2009 Checklist

| Section/topic                 | #  | Checklist item                                                                                                                                                                                           | Reported on page # |
|-------------------------------|----|----------------------------------------------------------------------------------------------------------------------------------------------------------------------------------------------------------|--------------------|
| Risk of bias across studies   | 15 | Specify any assessment of risk of bias that may affect the cumulative evidence (e.g., publication bias, selective reporting within studies).                                                             | N/A                |
| Additional analyses           | 16 | Describe methods of additional analyses (e.g., sensitivity or subgroup analyses, meta-regression), if done, indicating which were pre-specified.                                                         | N/A                |
| <b>RESULTS</b>                |    |                                                                                                                                                                                                          |                    |
| Study selection               | 17 | Give numbers of studies screened, assessed for eligibility, and included in the review, with reasons for exclusions at each stage, ideally with a flow diagram.                                          | 6                  |
| Study characteristics         | 18 | For each study, present characteristics for which data were extracted (e.g., study size, PICOS, follow-up period) and provide the citations.                                                             | 5-6-8              |
| Risk of bias within studies   | 19 | Present data on risk of bias of each study and, if available, any outcome level assessment (see item 12).                                                                                                | N/A                |
| Results of individual studies | 20 | For all outcomes considered (benefits or harms), present, for each study: (a) simple summary data for each intervention group (b) effect estimates and confidence intervals, ideally with a forest plot. | 19/28              |
| Synthesis of results          | 21 | Present results of each meta-analysis done, including confidence intervals and measures of consistency.                                                                                                  | N/A                |
| Risk of bias across studies   | 22 | Present results of any assessment of risk of bias across studies (see item 15).                                                                                                                          | N/A                |
| Additional analysis           | 23 | Give results of additional analyses, if done (e.g., sensitivity or subgroup analyses, meta-regression [see item 16]).                                                                                    | N/A                |
| <b>DISCUSSION</b>             |    |                                                                                                                                                                                                          |                    |
| Summary of evidence           | 24 | Summarize the main findings including the strength of evidence for each main outcome; consider their relevance to key groups (e.g., healthcare providers, users, and policy makers).                     | 10-13              |
| Limitations                   | 25 | Discuss limitations at study and outcome level (e.g., risk of bias), and at review-level (e.g., incomplete retrieval of identified research, reporting bias).                                            | 10                 |
| Conclusions                   | 26 | Provide a general interpretation of the results in the context of other evidence, and implications for future research.                                                                                  | 12-13              |
| <b>FUNDING</b>                |    |                                                                                                                                                                                                          |                    |
| Funding                       | 27 | Describe sources of funding for the systematic review and other support (e.g., supply of data); role of funders for the systematic review.                                                               | N/A                |

From: Moher D, Liberati A, Tetzlaff J, Altman DG, The PRISMA Group (2009). Preferred Reporting Items for Systematic Reviews and Meta-Analyses: The PRISMA Statement. PLoS Med 6(6): e1000097. doi:10.1371/journal.pmed1000097

For more information, visit: [www.prisma-statement.org](http://www.prisma-statement.org).

Page 2 of 2

1  
2  
3  
4  
5  
6  
7  
8  
9  
10  
11  
12  
13  
14  
15  
16  
17  
18  
19  
20  
21  
22  
23  
24  
25  
26  
27  
28  
29  
30  
31  
32  
33  
34  
35  
36  
37  
38  
39  
40  
41  
42  
43  
44  
45  
46  
47  
48  
49  
50  
51  
52  
53  
54  
55  
56  
57  
58  
59  
60



| Year        | Cases | M/F ratio | Median age |
|-------------|-------|-----------|------------|
| Bone        |       |           |            |
| 1985-1994   | 762   | 1.31      | 35         |
| 1995-2004   | 709   | 1.35      | 33         |
| Soft tissue |       |           |            |
| 1985-1994   | 5615  | 0.98      | 56         |
| 1995-2004   | 6256  | 0.82      | 58         |

Figure 7

Sex ratio and median age of patients in Thames Cancer Registry for whom survival data are provided in Table 6.

For peer review only
